# Supplementary material for: Ten-years cardiovascular risk among Bangladeshi population using non-laboratory-based risk chart of the World Health Organization: Findings from a nationally representative survey
Source: PLOS journal article supplement (doi:10.1371/journal.pone.0251967), 2021-05-26
Supplement: S4 (10.1371/journal.pone.0251967.s004) [file journal.pone.0251967.s004]

#### 1.1.1.1.1 Questionnaire for the Selection of HH member

## Section 1: Information about the interview

| No.      | Variable            | Question                               | Response      |                        | Code                                                          | Instruction |
|----------|---------------------|----------------------------------------|---------------|------------------------|---------------------------------------------------------------|-------------|
| 101      | HS_101              | Interviewers Name and ID               | _ _ _         |                        | Write down your Full Name and Id                              |             |
| 102      | HS_102              | Cluster Name and Code                  | _ _ _         |                        | Filled out before starting Interview                          |             |
| 104      | HS_104              | Union name and code                    | _ _ _         |                        |                                                               |             |
| 106      | HS_106              | Upazilla name and code                 | _ _ _         |                        |                                                               |             |
| 108      | HS_108              | District name and code                 | _ _ _         |                        |                                                               |             |
| 110      | HS_110              | Division name and code                 | _ _ _         |                        |                                                               |             |
| 112      | HS_112              | Household Code                         | _ _ _ _ _ _ _ |                        |                                                               |             |
| 113      | HS_113              | Total member of Household              | _ _ _         |                        |                                                               |             |
| 114      | HS_114              | HH Head Name                           | _ _ _ _ _ _ _ |                        |                                                               |             |
|          | HS_114A             | HH head Father/Husband Name(Nick Name) | _ _ _ _ _ _ _ |                        |                                                               |             |
| 104      | HS_104A             | House name                             | _ _ _ _ _ _ _ |                        |                                                               |             |
|          | HS_104B             | Village/Para Name                      | _ _ _ _ _ _ _ |                        |                                                               |             |
| 115      | HS_115A             | How many member of your HH/Family      | _ _ _         |                        | Exclude the HH member who are staying outside for a long time |             |
|          |                     |                                        | A. Total      | B. Sex                 |                                                               |             |
|          | HS_115B             | 0-5 Years Child                        | _             |                        |                                                               |             |
|          | HS_115BA            | Namet _ _ _ _ _ _ _                    |               | 1 = Male<br>2 = Female |                                                               |             |
|          | HS_115BB            | Namet _ _ _ _ _ _ _                    |               | 1 = Male<br>2 = Female |                                                               |             |
|          | HS_115BC            | Namet _ _ _ _ _ _ _                    |               | 1 = Male<br>2 = Female |                                                               |             |
|          | HS_115C             | 6-9 years of age child                 | _             |                        |                                                               |             |
|          | HS_115CA            | Namet _ _ _ _ _ _ _                    |               | 1 = Male<br>2 = Female |                                                               |             |
|          | HS_115CB            | Namet _ _ _ _ _ _ _                    |               | 1 = Male<br>2 = Female |                                                               |             |
|          | HS_115CC            | Namet _ _ _ _ _ _ _                    |               | 1 = Male<br>2 = Female |                                                               |             |
|          | HS_115D             | 10-19 years Adolescent Boys and Girls  | _             |                        |                                                               |             |
|          | HS_115DA            | Namet _ _ _ _ _ _ _                    |               | 1 = Male<br>2 = Female |                                                               |             |
|          | HS_115DB            | Namet _ _ _ _ _ _ _                    |               | 1 = Male<br>2 = Female |                                                               |             |
|          | HS_115DC            | Namet _ _ _ _ _ _ _                    |               | 1 = Male<br>2 = Female |                                                               |             |
|          | HS_115E             | 20-59 years of age Male/Female         | _             |                        |                                                               |             |
| HS_115EA | Namet _ _ _ _ _ _ _ |                                        | 1 = Male      |                        |                                                               |             |

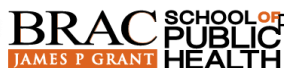

## National Nutrition Surveillance (NNS)

## Module-1:General Information

Page 2 of 82

## Section:1: General Information and HH Socioeconomic Status(SES)

Page 3 of 82

Do you have livestock or poultry currently at your household? If yes,how many you have?

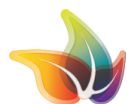

| No.                                                                                                                                                                                                                                                                                                                                                                           | Variable | Question                                                                                                                                                                                                          | Responses and code categories                                                                                                                                                                                                                                                               | Code                                                                                                                                         | Instructions/Skip                 |
|-------------------------------------------------------------------------------------------------------------------------------------------------------------------------------------------------------------------------------------------------------------------------------------------------------------------------------------------------------------------------------|----------|-------------------------------------------------------------------------------------------------------------------------------------------------------------------------------------------------------------------|---------------------------------------------------------------------------------------------------------------------------------------------------------------------------------------------------------------------------------------------------------------------------------------------|----------------------------------------------------------------------------------------------------------------------------------------------|-----------------------------------|
| 113                                                                                                                                                                                                                                                                                                                                                                           | SE_113   | What is the main construction material used for the outer wall of respondent's house?<br><br>(Record based on your own observation)                                                                               | <b>Natural walls</b><br>1= No walls<br>2= Cane/ Palm/ Trunk<br>3= Dirt<br><br><b>Rudimentary walls</b><br>4= Bamboo with mud<br>5= Stone with mud<br>6= Playwood<br>7 = Cardboard/polythene                                                                                                 | <b>Finished walls</b><br>8= Tin<br>9=Bricks/ Cement<br>10= Stone with lime/ Cement<br>11= Wood planks/ Shingles<br>99 = Other (Specify)_____ | (Record answer after observation) |
| 114                                                                                                                                                                                                                                                                                                                                                                           | SE_114   | What is the main construction material used for the roof of respondent's house?<br><br>(Record based on your own observation)                                                                                     | <b>Natural Roofing</b><br>1= No roof<br>2= Thatch/ Palm leaf<br><br><b>Rudimentary roofing</b><br>3= Bamboo/Mud<br>4= Wood Planks<br>5 = Cardboard/ polythene                                                                                                                               | <b>Finished roofing</b><br>6= Tin<br>7= Wood<br>8= Ceramic Tiles<br>9=Bricks/ Cement<br>10=Wooden blade<br>99 = Other (Specify)____          |                                   |
| 115                                                                                                                                                                                                                                                                                                                                                                           | SE_115   | What is the main construction material used for the floor of respondent's house?<br><br>(Record based on your own observation)                                                                                    | <b>Natural Floor</b><br>1= Earth/Sand<br><br><b>Rudimentary Floor</b><br>2= Wood Planks<br>3= Palm/ Bamboo                                                                                                                                                                                  | <b>Finished Floor</b><br>4= Ceramic Tiles<br>5=Bricks/ Cement<br>6=Mojaic<br>99 = Others (Specify)_____                                      |                                   |
| 116                                                                                                                                                                                                                                                                                                                                                                           | SE_116   | How many living rooms does your household have (Including homemaker room)                                                                                                                                         | _____                                                                                                                                                                                                                                                                                       |                                                                                                                                              |                                   |
| 117                                                                                                                                                                                                                                                                                                                                                                           | SE_117   | At present, any member of your household has been taking any advantage from the specified government program?<br>(May be multiple answers,if coded "food for work"then justify,is it running government program?) | 1 =Get nothing<br>2 =Money for education<br>3 =Freedom fighter allowance<br>4 =Elderly allowance<br>5 =V.G.D<br>6 =Widow allowance<br>7 = 100 days program(money for work,current program)<br>8 =V.G.F<br>9 =National service program<br>77 =Don,t know<br>99 Others (specify bellow) _____ |                                                                                                                                              |                                   |
| 118                                                                                                                                                                                                                                                                                                                                                                           | SE_118   | Religion<br><i>Instruction:</i><br>Write down the religions of respondent                                                                                                                                         | 1 = Islam      2= Hindu<br>3 = Christian      4 = Buddhist<br>99 = Others (Specify)_____                                                                                                                                                                                                    |                                                                                                                                              |                                   |
| 119                                                                                                                                                                                                                                                                                                                                                                           | SE_119   | What is your ethnicity?                                                                                                                                                                                           | _____                                                                                                                                                                                                                                                                                       |                                                                                                                                              |                                   |
| <b>Codet</b> 1 =Chakma; 2 =Marma; 3 =Tripurav; 4 =Murong; 5 =Toncongav; 6 =Bom; 7 =Pankho; 8 =Chak; 9 =Khyangs; 10 =Khumi; 11 =Lusai; 12 =Koch; 13 =Saowtal; 14 =Daluy; 15 =Lusai; 16 =Rakhain; 17 =Monipuri; 18 =Garow; 19 =Hajong; 20 =Khasiyav; 21 =Mongs; 22 =Oraow; 23 =Bormon; 24 =Pahari; 25 =Mal pahari; 26 =Munda; 27 =Khol; 28 =Bangali; 99 = Others (Specify)_____ |          |                                                                                                                                                                                                                   |                                                                                                                                                                                                                                                                                             |                                                                                                                                              |                                   |
| 120                                                                                                                                                                                                                                                                                                                                                                           | SE_120   | Did you receive money from anyone during last 6 month who are not in your HH (who                                                                                                                                 | 1 = No<br>2 = Yes<br>77 = Dont Know                                                                                                                                                                                                                                                         |                                                                                                                                              | If answer No then go to 122       |



National Nutrition Surveillance (NNS)

| No. | Variable | Question                                                                                | Responses and code categories                                                      | Code | Instructions/<br>Skip |
|-----|----------|-----------------------------------------------------------------------------------------|------------------------------------------------------------------------------------|------|-----------------------|
|     |          | are from abroad or other area)                                                          |                                                                                    |      |                       |
| 121 | SE_121   | On average, How much amount you have received per month ?<br>(Considering last 6 month) |  |      |                       |
| 122 | SE_122   | What is your average monthly household income ?                                         |  |      |                       |

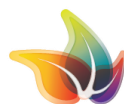

**Section 2: Household water, sanitation and Hygiene**

| No. | Variable | Question                                                                                                                                                                                                                                                                                                                              | Response                                                                                                                                                                                                                                                                                                                                                                                                                           | Code            | Instruction                 |
|-----|----------|---------------------------------------------------------------------------------------------------------------------------------------------------------------------------------------------------------------------------------------------------------------------------------------------------------------------------------------|------------------------------------------------------------------------------------------------------------------------------------------------------------------------------------------------------------------------------------------------------------------------------------------------------------------------------------------------------------------------------------------------------------------------------------|-----------------|-----------------------------|
| 201 | WH_201   | What is the main source of drinking water of your household?                                                                                                                                                                                                                                                                          | <b>Piped Water</b><br>1= Piped to dwelling<br>2= Piped to yard/plot<br>3= Public tap<br><br><b>Tube Well or Borehole</b><br>4= Shared<br>5 = Household<br><br><b>Dug Well</b><br>6= Protected<br>7= Unprotected<br>8= Rainwater<br><b>Groud water</b><br>9= Surface water (Pond/ River/ Canal/Hawar/ irrigation channels)<br>10= Water tanker<br><b>Spring</b><br>11 = Protected<br>12 = Unprotected<br>99 = Others (Specify)_____ |                 |                             |
| 202 | WH_202   | Do you have any soap in your household?                                                                                                                                                                                                                                                                                               | 1= Yes ; 2= No                                                                                                                                                                                                                                                                                                                                                                                                                     |                 |                             |
| 203 | WH_203   | Did you use soap within the last 24 hours?                                                                                                                                                                                                                                                                                            | 1= Yes ; 2= No                                                                                                                                                                                                                                                                                                                                                                                                                     |                 | If No, go to 205 question.  |
| 204 | WH_204   | If you used soap today or yesterday, then why you used soap?<br><br><i>If the respondent answered, washed hand myself or my child then try to know other purpose of use, just probe it don't read out the answer code. (Multiple answers can be coded, Do not read out the answers code, ask "what else" until get right answer.)</i> | 1= Washing cloths                                                                                                                                                                                                                                                                                                                                                                                                                  | 1= Yes<br>2= No |                             |
|     |          |                                                                                                                                                                                                                                                                                                                                       | 2= Washing my body                                                                                                                                                                                                                                                                                                                                                                                                                 | 1= Yes<br>2= No |                             |
|     |          |                                                                                                                                                                                                                                                                                                                                       | 3= Washing my children                                                                                                                                                                                                                                                                                                                                                                                                             | 1= Yes<br>2= No |                             |
|     |          |                                                                                                                                                                                                                                                                                                                                       | 4= Washing child's bottoms                                                                                                                                                                                                                                                                                                                                                                                                         | 1= Yes<br>2= No |                             |
|     |          |                                                                                                                                                                                                                                                                                                                                       | 5= Washing my children's hands                                                                                                                                                                                                                                                                                                                                                                                                     | 1= Yes<br>2= No |                             |
|     |          |                                                                                                                                                                                                                                                                                                                                       | 6= Washing hands after defecating                                                                                                                                                                                                                                                                                                                                                                                                  | 1= Yes<br>2= No |                             |
|     |          |                                                                                                                                                                                                                                                                                                                                       | 7= Washing hands after cleaning child                                                                                                                                                                                                                                                                                                                                                                                              | 1= Yes<br>2= No |                             |
|     |          |                                                                                                                                                                                                                                                                                                                                       | 8= Washing hands before feeding child                                                                                                                                                                                                                                                                                                                                                                                              | 1= Yes<br>2= No |                             |
|     |          |                                                                                                                                                                                                                                                                                                                                       | 9= Washing hands before preparing food                                                                                                                                                                                                                                                                                                                                                                                             | 1= Yes<br>2= No |                             |
|     |          |                                                                                                                                                                                                                                                                                                                                       | 10= Washing hands before eating                                                                                                                                                                                                                                                                                                                                                                                                    | 1= Yes<br>2= No |                             |
|     |          |                                                                                                                                                                                                                                                                                                                                       | 11= Others (Specify)_____                                                                                                                                                                                                                                                                                                                                                                                                          | 1= Yes<br>2= No |                             |
| 205 | WH_205   | What type of toilet used by your family members?<br><br>(Ensured after your own observation)                                                                                                                                                                                                                                          | 1= Piped sewer system<br>2= Septic tank<br>3= Ring slab with water seal<br>4= Ring slab without water seal<br>5= Pit latrine with slab<br>6= Pit latrine without slab<br>7= Hanging latrine<br>8= No facility (Bush/open field/river pond side)<br>99= Others (Specify)_____                                                                                                                                                       |                 | If Answer '8', go to WH_207 |
| 206 | WH_206   | Is your toilet shared or a public toilet?<br><br><i>(Ask regardless of location. A <b>shared</b> toilet is a joint asset between a set numbers of household. <b>Public</b> means the number of people sharing is not precisely know...i.e a community toilet)</i>                                                                     | 1= Not shared<br>2= Shared<br>3= Communal<br>4= Don't know                                                                                                                                                                                                                                                                                                                                                                         |                 |                             |

| No. | Variable | Question                                                                                                                                                                                                                                                                                                                                    | Response                                                                                                                                                                                                                                                                                                                   | Code | Instruction                                   |
|-----|----------|---------------------------------------------------------------------------------------------------------------------------------------------------------------------------------------------------------------------------------------------------------------------------------------------------------------------------------------------|----------------------------------------------------------------------------------------------------------------------------------------------------------------------------------------------------------------------------------------------------------------------------------------------------------------------------|------|-----------------------------------------------|
| 207 | WH_207   | Do you go to the toilet wearing shoes?                                                                                                                                                                                                                                                                                                      | 1= Yes ;          2= No                                                                                                                                                                                                                                                                                                    |      |                                               |
| 208 | WH_208   | <p>Could you show me where you usually wash your hands?</p> <p><i>(Ask and observe)</i></p>                                                                                                                                                                                                                                                 | <p>0= Modern piped facilities in dwelling<br/>           1= Inside/near toilet facility<br/>           2= Inside/near kitchen/cooking place<br/>           3= Elsewhere in yard<br/>           4=Inside yard<br/>           5= Outside yard<br/>           6= No specific place<br/>           8= No permission to see</p> |      | <p>If Answer 6/8, then go to section 3A .</p> |
| 209 | WH_209   | <p>Is there any soap or detergent or locally used cleansing agent? Circle the answer code after your observation.</p> <p>This item should be either in place or brought by the interviewee within one minute then code “yes”. If the item is not present within one minute check none, even if brought out later then code “5”.</p>         | <p>1= Soap<br/>           2= Detergent<br/>           3= Ash<br/>           4= Mud/sand<br/>           5= None<br/>           99= Other<br/>           (Specify)_____</p>                                                                                                                                                  |      |                                               |
| 210 | WH_210   | <p>Is there water? Circle the answer code after your observation.</p> <p>Interviewer: turn on tap and/or a check container and note if water is present. This item should be either in place or brought by the interviewee within one minute.</p> <p>If the item is not present within one minute check no, even if brought out later.</p>  | <p>1= Yes ;          2= No</p>                                                                                                                                                                                                                                                                                             |      |                                               |
| 211 | WH_211   | <p>Are there any hand washing materials such as a tap, basin, bucket, sink, or tippy tap? Please circle the answer code based on your observation.</p> <p>This item should be either in place or brought by the interviewee within one minute.</p> <p>If the item is not present within one minute check no, even if brought out later.</p> | <p>1= Yes ;          2= No</p>                                                                                                                                                                                                                                                                                             |      |                                               |



### Section 3A: Household Food Security and Coping Strategies (Last one month)

Now I would like to take a few minutes of your time to ask you about food security in your household. I am going to ask you to think back over the past four weeks and try to remember how often and in what ways your household experienced food insecurity. Please note that whenever I say "household" I mean a group of people who usually share food from the same cooking pots. If you have any questions at any time, please feel free to stop me and ask.

| No. | Variable | Question                                                                                                                                                                                           | Response                                                                                                     | Code | Instruction                                                                                                                                    |
|-----|----------|----------------------------------------------------------------------------------------------------------------------------------------------------------------------------------------------------|--------------------------------------------------------------------------------------------------------------|------|------------------------------------------------------------------------------------------------------------------------------------------------|
| 301 | FS_301   | In the past four weeks, did you ever worry that your family would not have enough food due to lack of resources or money to buy food?                                                              | 0= Never<br>1= Rarely (Once or twice)<br>2= Sometimes (Three or ten times)<br>3= Often (More than ten times) |      |                                                                                                                                                |
| 302 | FS_302   | In the past four weeks, were you or any family members ever not able to eat the kinds of foods you preferred because of a lack of resources or money to buy food?                                  | 0= Never<br>1= Rarely (Once or twice)<br>2= Sometimes (Three or ten times)<br>3= Often (More than ten times) |      | "Preferred foods" might be things like <i>polao</i> , <i>biriyani</i> , fish, meat, yoghurt, sweets or anything your household prefers to eat. |
| 303 | FS_303   | In the past four weeks, did you or any household member ever have to eat a limited variety of foods due to lack of resources?(e.g.onion,garlic                                                     | 0= Never<br>1= Rarely (Once or twice)<br>2= Sometimes (Three or ten times)<br>3= Often (More than ten times) |      |                                                                                                                                                |
| 304 | FS_304   | In the last 4 weeks did you or any member of your family Had to eat any food that usually did not eat (such as wild/non food/ instead of rice any other food that usually does not eat) ?          | 0= Never<br>1= Rarely (Once or twice)<br>2= Sometimes (Three or ten times)<br>3= Often (More than ten times) |      |                                                                                                                                                |
| 305 | FS_305   | In the past four weeks, did you or any household member ever have to eat a smaller meal at breakfast, lunch, or dinner than you felt you needed because there was not enough food for your family? | 0= Never<br>1= Rarely (Once or twice)<br>2= Sometimes (Three or ten times)<br>3= Often (More than ten times) |      |                                                                                                                                                |
| 306 | FS_306   | In the past four weeks, did you or any other household member ever have to eat fewer than three meals in a day because there were not enough resources or money to purchase food?                  | 0= Never<br>1= Rarely (Once or twice)<br>2= Sometimes (Three or ten times)<br>3= Often (More than ten times) |      |                                                                                                                                                |
| 307 | FS_307   | In the past four weeks, did you or any household member ever go to sleep at night hungry because there was not enough money to purchase food?                                                      | 0= Never<br>1= Rarely (Once or twice)<br>2= Sometimes (Three or ten times)<br>3= Often (More than ten times) |      |                                                                                                                                                |
| 308 | FS_308   | In the past four weeks, did you or any household member ever go to sleep at night hungry because there was not enough money to purchase food?                                                      | 0= Never<br>1= Rarely (Once or twice)<br>2= Sometimes (Three or ten times)<br>3= Often (More than ten times) |      |                                                                                                                                                |

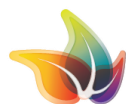

| No. | Variable | Question                                                                                                                                                           | Response                                                                                                     |        |        | Code | Instruction                 |
|-----|----------|--------------------------------------------------------------------------------------------------------------------------------------------------------------------|--------------------------------------------------------------------------------------------------------------|--------|--------|------|-----------------------------|
| 309 | FS_309   | In the past four weeks, did you or any household member ever go a whole day and night without eating anything because there was not enough money to purchase food? | 0= Never<br>1= Rarely (Once or twice)<br>2= Sometimes (Three or ten times)<br>3= Often (More than ten times) |        |        |      | If answer 0 then go to 310. |
| 310 | FS_310   | Did you (household) have to do the following activities to overcome food shortage during the last 4 weeks??                                                        | A. Sale/ Mortgage if assets                                                                                  | 1= Yes | 2 = No |      |                             |
|     |          |                                                                                                                                                                    | B. Eat low quality food                                                                                      | 1= Yes | 2 = No |      |                             |
|     |          |                                                                                                                                                                    | C. Eat less items of foods                                                                                   | 1= Yes | 2 = No |      |                             |
|     |          |                                                                                                                                                                    | D. Stop schooling of HH members                                                                              | 1= Yes | 2 = No |      |                             |
|     |          |                                                                                                                                                                    | E. Borrow food                                                                                               | 1= Yes | 2 = No |      |                             |
|     |          |                                                                                                                                                                    | F. Take loan                                                                                                 | 1= Yes | 2 = No |      |                             |

## 82





মডিউল ৩: শিশুর (০-৫ বছর) প্রশ্নপত্র

পরিচ্ছেদ ১: সাধারণ তথ্যাবলী

| No. | Variable | Question                                                                                                                                                                                                                                                                              | Response                                                                                                                                                                                                                                                                                                                                                                                                                                                                                                                                                                                            | Code | Instruction |
|-----|----------|---------------------------------------------------------------------------------------------------------------------------------------------------------------------------------------------------------------------------------------------------------------------------------------|-----------------------------------------------------------------------------------------------------------------------------------------------------------------------------------------------------------------------------------------------------------------------------------------------------------------------------------------------------------------------------------------------------------------------------------------------------------------------------------------------------------------------------------------------------------------------------------------------------|------|-------------|
| 101 | CI_101   | Child Name (with nick name)                                                                                                                                                                                                                                                           | _____                                                                                                                                                                                                                                                                                                                                                                                                                                                                                                                                                                                               |      |             |
| 102 | CI_102   | Child Date of birth                                                                                                                                                                                                                                                                   | ____/____/20____<br>DD / MM / YYYY                                                                                                                                                                                                                                                                                                                                                                                                                                                                                                                                                                  |      |             |
| 103 | CI_103   | Age of child (Write completed years of age)                                                                                                                                                                                                                                           | A. ____ Year<br>B. ____ Month                                                                                                                                                                                                                                                                                                                                                                                                                                                                                                                                                                       |      |             |
| 104 | CI_104   | Sex of the child                                                                                                                                                                                                                                                                      | 1 = Male    2 = Female                                                                                                                                                                                                                                                                                                                                                                                                                                                                                                                                                                              |      |             |
| 105 | CI_105   | Completed years of education of Child Mother<br><br><b>[Instruction: Write down in total, the years the respondent spent in school for formal education (Is completed years) [Excluding pre-school and informal education]. Write down "00" if no formal education.]</b>              | ____ Years<br><ul style="list-style-type: none"> <li>Primary/Ebtedayee=5</li> <li>Secondary/Dakhil=10</li> <li>Highersecondary/Diploma/Alim=12</li> <li>Graduate/Fazil=16</li> <li>Post graduate=18</li> </ul>                                                                                                                                                                                                                                                                                                                                                                                      |      |             |
| 106 | CI_106   | Main occupation of Child Mother during last 12 month?<br><b>Instruction:</b><br>If the respondent involved more than one profession since last 12 months, then consider the main occupation which she spent most of the time and write down the answer code.                          | 1 = Agricultural work(paddy)<br>2 = Agricultural work(without paddy)<br>3 = Agricultural day labor<br>4 = Unskilled day labor<br>5 = Skilled day labor<br>6 = Rickshaw puller/ van/Wheel barrow/Baby taxi/ Boatman<br>7 = Fisherman<br>8 = Employer<br>9 = Professionals<br>10 = Businessman<br>11 = Petty businessman<br>12 = House maid<br>13 = Zoom farmer<br>14 = Do not earn<br>15 = Poultry/dairy farmer<br>16 = Handicrafts<br>17 = Spinach vegetable<br>18 = Fishery<br>19 = Housewife<br>20 = Student<br>77 = Don't know<br>66 = Age below 06 years<br>99 = Others(specify below)<br>..... |      |             |
| 107 | CI_107   | Completed years of education of Child (Child name) Father<br><br><b>[Instruction: Write down in total, the years the respondent spent in school for formal education (Is completed years) [Excluding pre-school and informal education]. Write down "00" if no formal education.]</b> | ____ Years<br><ul style="list-style-type: none"> <li>Primary/Ebtedayee=5</li> <li>Secondary/Dakhil=10</li> <li>Highersecondary/Diploma/Alim=12</li> <li>Graduate/Fazil=16</li> <li>Post graduate=18</li> </ul>                                                                                                                                                                                                                                                                                                                                                                                      |      |             |



## National Nutrition Surveillance (NNS)

| No. | Variable | Question                                              | Response                                                                                                                                                                                                                                                                                                                                                                                                                                                                                                                                                                      | Code | Instruction |
|-----|----------|-------------------------------------------------------|-------------------------------------------------------------------------------------------------------------------------------------------------------------------------------------------------------------------------------------------------------------------------------------------------------------------------------------------------------------------------------------------------------------------------------------------------------------------------------------------------------------------------------------------------------------------------------|------|-------------|
| 108 | CI_108   | Main occupation of Child Father during last 12 month? | 1 = Agricultural work(paddy)<br>2 = Agricultural work(without paddy)<br>3 = Agricultural day labor<br>4 = Unskilled day labor<br>5 = Skilled day labor<br>6= Rickshaw puller/ van/Wheel barrow/Baby taxi/ Boatman<br>7=Fisherman<br>8=Employer<br>9=Professionals<br>10=Businessman<br>11= Petty businessman<br>12= House maid<br>13=Zoom fermar<br>14= Do not earn<br>15=Poultry/dairy fermar<br>16=Handicrafts<br>17 =Spinach vegetable<br>18=Fishery<br>19 = Housewife<br>20= Student<br>77 = Don,t know<br>66 =Age below 06 years<br>99 = Others(specify bellow)<br>..... |      |             |

## Page 15 of 82

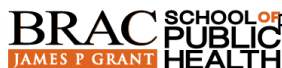

## National Nutrition Surveillance (NNS)

### Section 3: Dietary diversity

| No | Variable | Question | Yesterday during the day or night, did your child consume the following food items? (A) | During the last 07 days, how many days did your child consume the following food items (B) | D |
|----|----------|----------|-----------------------------------------------------------------------------------------|--------------------------------------------------------------------------------------------|---|
|----|----------|----------|-----------------------------------------------------------------------------------------|--------------------------------------------------------------------------------------------|---|

Now I would like to request describing the food items that you have feed your child(child name) at home and outside of home during the last day of the study (from yesterday morning 6.00 am to today morning 6.00 am) .Please tell me,all types of food, drinks that fed your child (child name) at morning, noon, dinner, or breakfast / light breakfast. Remembering If you fed any of food during the cooking, please tell us including all.

Start the interview like, which food give your child at the morning time .

- What did you feed (child name) in the morning wake up ? Did you feed anything more?
- What did you feed more in the morning? Did you feed anything more?
- What did you feed at noon? Did you feed anything more?
- What did you feed at afternoon? Did you feed anything more?
- What did you feed at evening? Did you feed anything more?
- What did you feed at dinner? Did you feed anything more?

Record first the answer of the questions of column A. collect the answer for column B/C after recording the answer of the questions of A.

|     |                  | Food Category                                | Food Type                                                                                                    | (A)               | (B)                                                                    |                      |
|-----|------------------|----------------------------------------------|--------------------------------------------------------------------------------------------------------------|-------------------|------------------------------------------------------------------------|----------------------|
| 301 | CDD_301<br>A/B/C | Starchy Staples/<br>Food made from<br>grains | Rice,flour bread, wheat, muri,<br>maize,kichuri,barli,oot,kinoya,noodles,pasta                               | 1 = Yes<br>2 = No | <input type="text"/> <input type="text"/> <input type="text"/><br>days | <input type="text"/> |
| 302 | CDD_302<br>A/B/C | Starchy Staples/<br>(root,tubers,tissue)     | potatoes, sweet potatoes,sagu,<br>eranut,cave,shalgam,kuchu,wiggle,ripe banana shaloo                        | 1 = Yes<br>2 = No | <input type="text"/> <input type="text"/> <input type="text"/><br>days | <input type="text"/> |
| 303 | CDD_303<br>A/B/C | Lentils/Pulses                               | Dal/khicuri,peas,motor,soybean,tofu peanuts, humas                                                           | 1 = Yes<br>2 = No | <input type="text"/> <input type="text"/> <input type="text"/><br>days | <input type="text"/> |
| 304 | CDD_304<br>A/B/C | Legumes and Nuts                             | Peanut, Pistachios, kazu or any kond of peanut, ciya seeds, til,<br>tisi,sunflower seeds,sweet pumpkin seeds | 1 = Yes<br>2 = No | <input type="text"/> <input type="text"/> <input type="text"/><br>days | <input type="text"/> |
| 305 | CDD_305<br>A/B/C | Dark green leafy<br>vegetables               | All kinds of leafy vegetables (poo,kuchu, kalmi) Brooklyn                                                    | 1 = Yes<br>2 = No | <input type="text"/> <input type="text"/> <input type="text"/><br>days | <input type="text"/> |
| 306 | CDD_306<br>A/B/C | Red/orange/yellow<br>vegetables              | Orange sweet potato,pumpkin, carrot or other yellow or orange<br>vegetable                                   | 1 = Yes<br>2 = No | <input type="text"/> <input type="text"/> <input type="text"/><br>days | <input type="text"/> |
| 307 | CDD_307<br>A/B/C | Red/orange/yellow<br>fruits                  | Ripe mangoes, papaya, jackfruits other red/yellow or orange<br>fruit                                         | 1 = Yes<br>2 = No | <input type="text"/> <input type="text"/> <input type="text"/><br>days | <input type="text"/> |
| 308 | CDD_308<br>A/B/C | Vitamin C rich fruits                        | Guava, Strawberry, Lemon, Orange,grapes, Pineapple,raw<br>mango,amalaki,kueue,tomatos                        | 1 = Yes<br>2 = No | <input type="text"/> <input type="text"/> <input type="text"/><br>days | <input type="text"/> |
| 309 | CDD_309<br>A/B/C | Vitamin C rich<br>vegetables                 | Raw tomato,chilli pepper, brussels sprouts,cauliflower,cabbage                                               | 1 = Yes<br>2 = No | <input type="text"/> <input type="text"/> <input type="text"/><br>days | <input type="text"/> |
| 310 | CDD_310<br>A/B/C | Other vegetables<br>or fruits                | peas, asparagas, bit,koci bash,<br>cauliflower,selari,shawsha,brinjal,letus,masrum,mula,jukini               | 1 = Yes<br>2 = No | <input type="text"/> <input type="text"/> <input type="text"/><br>days | <input type="text"/> |
| 311 | CDD_311<br>A/B/C | Other fruits                                 | Apple, avakado,bam, cherry,ripe jackfruit                                                                    | 1 = Yes<br>2 = No | <input type="text"/> <input type="text"/> <input type="text"/><br>days | <input type="text"/> |

| No  | Variable         | Question                        |                                                                                                                                                                         | Yesterday during the day or night, did your child consume the following food items? (A) | During the last 07 days, how many days did your child consume the following food items (B) | D |
|-----|------------------|---------------------------------|-------------------------------------------------------------------------------------------------------------------------------------------------------------------------|-----------------------------------------------------------------------------------------|--------------------------------------------------------------------------------------------|---|
|     |                  |                                 |                                                                                                                                                                         |                                                                                         |                                                                                            |   |
| 312 | CDD_312<br>A/B/C | Eggs                            | Hen/duck, other birds,                                                                                                                                                  | 1 = Yes<br>2 = No                                                                       | <input type="text"/> <input type="text"/><br>days                                          | L |
| 313 | CDD_313<br>A/B/C | Organ meat                      | Cheeks, liver, Stomach, Ridpind, Kidney                                                                                                                                 | 1 = Yes<br>2 = No                                                                       | <input type="text"/> <input type="text"/><br>days                                          | L |
| 314 | CDD_314<br>A/B/C | Flesh                           | Beef, Pork, Veal, Lamb, Goat, Chicken, Duck or flesh of any other animal                                                                                                | 1 = Yes<br>2 = No                                                                       | <input type="text"/> <input type="text"/><br>days                                          | L |
| 315 | CDD_315<br>A/B/C | Small Fish                      | Small Fish Eaten Whole with Bones (i.e.Kachki, mola, dhela, chapila, batashi, small prawn, dried fish)                                                                  | 1 = Yes<br>2 = No                                                                       | <input type="text"/> <input type="text"/><br>days                                          | L |
| 316 | CDD_316<br>A/B/C | Large fish/sea food             | Large Whole Fish and Shell Fish and dried fish                                                                                                                          | 1 = Yes<br>2 = No                                                                       | <input type="text"/> <input type="text"/><br>days                                          | L |
| 317 | CDD_317<br>A/B/C | Dairy                           | Milk, cheese, yogurt or other milk products                                                                                                                             | 1 = Yes<br>2 = No                                                                       | <input type="text"/> <input type="text"/><br>days                                          | L |
| 318 | CDD_318<br>A/B/C | Insects and other protein foods | Fish egg, insect, snail                                                                                                                                                 | 1 = Yes<br>2 = No                                                                       | <input type="text"/> <input type="text"/><br>days                                          | L |
| 319 | CDD_319<br>A/B/C | Edible Oil                      | Ghee, butter,cream, sour, fat, margarine, mayonnaise, palm oil, vegetable oil,                                                                                          | 1 = Yes<br>2 = No                                                                       | <input type="text"/> <input type="text"/><br>days                                          | L |
| 320 | CDD_320<br>A/B/C | Savory and fried snacks         | Crisps and chips, fried dough or other fried snacks singaru, samarcha                                                                                                   | 1 = Yes<br>2 = No                                                                       | <input type="text"/> <input type="text"/><br>days                                          | L |
| 321 | CDD_321<br>A/B/C | Sweets                          | Sugary foods, such as chocolates, candies, cookies/sweet biscuits and cakes, sweet pastries or ice cream, any kind of sweets ,honey ,halua , condensed milk,tiler khaza | 1 = Yes<br>2 = No                                                                       | <input type="text"/> <input type="text"/><br>days                                          | L |
| 322 | CDD_322<br>A/B/C | Miscellaneous (Sweet drinks)    | Tea with suger, soft drinks, juice, energy drinks,yogurt drinks,chocolate drinks, horlicks,moltova                                                                      | 1 = Yes<br>2 = No                                                                       | <input type="text"/> <input type="text"/><br>days                                          | L |
| 323 | CDD_323<br>A/B/C | Other beverages and foods       | Tea or coffee if not sweetened, clear broth, alcohol, Pickles, olives and similar                                                                                       | 1 = Yes<br>2 = No                                                                       | <input type="text"/> <input type="text"/><br>days                                          | L |
| 324 | CDD_324<br>A/B/C | Condiments/spices               | Spices, coriander leaves, sausage, garlic, ketchup, lemon juice, mint leaves, drinks, betel leaves, tobacco leaves, jars                                                | 1 = Yes<br>2 = No                                                                       | <input type="text"/> <input type="text"/><br>days                                          | L |



#### Section 4: Child Morbidity:

I will ask you some questions about your child illness during the last 2 weeks (If information is collected on Wednesday then tell from the last wendsday to privious wendsday to yesterday)

| No.                                                                                                                  | Variable | Question                                                                                                                                                               | Response                                                                                                                                                                                                                                                                                                                                                                                                                                                                                                                                                                                                               | Code | Instruction                                                           |
|----------------------------------------------------------------------------------------------------------------------|----------|------------------------------------------------------------------------------------------------------------------------------------------------------------------------|------------------------------------------------------------------------------------------------------------------------------------------------------------------------------------------------------------------------------------------------------------------------------------------------------------------------------------------------------------------------------------------------------------------------------------------------------------------------------------------------------------------------------------------------------------------------------------------------------------------------|------|-----------------------------------------------------------------------|
| 401                                                                                                                  | CM_401   | Was your child (name) sick in the last 2 weeks/ 14 days?                                                                                                               | 1 = Yes 2 = No                                                                                                                                                                                                                                                                                                                                                                                                                                                                                                                                                                                                         |      | If answer "2" go to 407                                               |
| <b>Has your child (Name) been suffering from any of the following diseases/conditions from last 2 weeks/14 days?</b> |          |                                                                                                                                                                        |                                                                                                                                                                                                                                                                                                                                                                                                                                                                                                                                                                                                                        |      |                                                                       |
| 402                                                                                                                  | CM_402A  | Fever in the last two weeks( child name)                                                                                                                               | 1 = Yes 2 = No<br>77= don't know                                                                                                                                                                                                                                                                                                                                                                                                                                                                                                                                                                                       |      |                                                                       |
|                                                                                                                      | CM_402B  | Runny Nose/ Cough in last 2 weeks(child name)                                                                                                                          | 1 = Yes 2 = No<br>77= don't know                                                                                                                                                                                                                                                                                                                                                                                                                                                                                                                                                                                       |      |                                                                       |
|                                                                                                                      | CM_402C  | Difficulty breathing in the last 2 weeks (child name)                                                                                                                  | 1 = Yes 2 = No<br>77= don't know                                                                                                                                                                                                                                                                                                                                                                                                                                                                                                                                                                                       |      |                                                                       |
|                                                                                                                      | CM_402D  | Diarrhea in the last 2 weeks (child name)<br>Please use local term of diarrhea if needed.                                                                              | 1 = Yes 2 = No<br>77= don't know                                                                                                                                                                                                                                                                                                                                                                                                                                                                                                                                                                                       |      |                                                                       |
| 403                                                                                                                  | CM_403   | In the last 2 weeks/14 days where did you seek treatment/ advice for any of these mentioned illnesses/diseases?                                                        | <b>GOVERNMENT PROVIDERS</b><br>1= Govt. Field worker<br>2= Govt. satellite clinic/ EPI Outreach clinic<br>3= Govt. Community clinic<br>4=Govt. Health & Family Welfare Centre<br>5=Govt. Upazila Health Complex<br>6= Govt. Maternal & Child Welfare Centre<br>Government<br>7=Other government Hospital<br><b>NGO PROVIDERS</b><br>8= NGO health clinic and hospital<br>9=NGO Field Worker<br>10= Community Nutrition Promoter (CNP)<br><b>PRIVATE PROVIDERS</b><br>11 = Private doctor/clinic/hospital<br>12 = Pharmacy<br>13 = Traditional healer<br>14 = Homeopath<br>15= from none<br>99 = Others (Specify) _____ |      | If not suffered by any disease within 14 days then skip this question |
| 404                                                                                                                  | CM_404   | How much amount of food, did you given to child (Name) when he/she was in sick/ill?<br>Given less than usual/as usual amount, more than usual? (including breast milk) | 1= Less<br>2= About same<br>3= More<br>4= Nothing to eat<br>5= Not yet began feeding<br>77 = Don't know                                                                                                                                                                                                                                                                                                                                                                                                                                                                                                                |      | If no disease with in last 2 weeks, skip this question                |



| No. | Variable | Question                                                                                                                                                                               |                                                                                                                                               | Response                                                                                                                    |    | Code | Instruction                                     |
|-----|----------|----------------------------------------------------------------------------------------------------------------------------------------------------------------------------------------|-----------------------------------------------------------------------------------------------------------------------------------------------|-----------------------------------------------------------------------------------------------------------------------------|----|------|-------------------------------------------------|
| 405 | CM_405   | (শিশুর নাম)Amount of drink did you given to child(Name) during diarrhoeal sickness?<br>Given less than usual/as usual amount, more than usual?<br>(including breast milk)              |                                                                                                                                               | 1= Less than usual<br>2= As usual<br>3= More than usual<br>4= Nothing to eat<br>5= yetn't started feeding<br>77= Don't know |    |      | If no occurred diarrhea then skip this question |
| 406 | CM_406   | Did you give (child name) the following liquids/drinks during illness in diarrhea (last 14 days)?<br><br>(IF ORS packet was given ask to see it and code if the packet contained zinc) |                                                                                                                                               | Yes                                                                                                                         | No |      | If not diarrhea skip this question              |
|     |          |                                                                                                                                                                                        | A.Packet saline (ORS)                                                                                                                         | 1                                                                                                                           | 2  |      |                                                 |
|     |          |                                                                                                                                                                                        | B. Home made saline ( Salt molasses / Salt sugar s aline)<br>(লবণ গুড়/ লবণ চিনির স্যালাইন)                                                   | 1                                                                                                                           | 2  |      |                                                 |
|     |          |                                                                                                                                                                                        | C.Rice saline(packet)                                                                                                                         | 1                                                                                                                           | 2  |      |                                                 |
|     |          |                                                                                                                                                                                        | D. Rice saline (home made)                                                                                                                    | 1                                                                                                                           | 2  |      |                                                 |
|     |          |                                                                                                                                                                                        | E. Zinc syrup/tablet/ORS                                                                                                                      | 1                                                                                                                           | 2  |      |                                                 |
| 407 | CM_407   | Did your child(child name) eat Vitamin 'A' Capsule in the last six month?                                                                                                              | 1=Yes, National VAC day/ VAC campaign<br>2=Yes, other sources (specify)_____<br>3=No<br>77= Don't know<br>88= Not applicable (< 6 month)_____ |                                                                                                                             |    |      |                                                 |
| 408 | CM_408   | Did your child (name) received any allopathic deworming agents the last six month?                                                                                                     | 1=Yes, National VAC day/ VAC campaign<br>2=Yes, other sources (specify)_____<br>3=No<br>77= Don't know<br>88= Not applicable (< 6 month)_____ |                                                                                                                             |    |      |                                                 |
| 409 | CM_409   | Was (Child's name) the children suffered from Jaundice in the last six months                                                                                                          | 1 = Yes 2 = No<br>77= don't know                                                                                                              |                                                                                                                             |    |      |                                                 |
| 410 | CM_410   | Is any your child identified (06 to 59 months) as SAM/MAM?                                                                                                                             | 1= Yes (with card)<br>2= Yes, (without card)<br>3=No<br>77= Don't remember<br>88=Not applicable(< 6 month)                                    |                                                                                                                             |    |      | If 'no' or 8 go to next section                 |
| 411 | CM_411   | Is any of your child (06 to 59 months) received any treatment who was/were suffering from SAM/MAM?                                                                                     | 1 = Yes 2 = No<br>77= don't know                                                                                                              |                                                                                                                             |    |      |                                                 |
| 412 | CM_412   | If answer "Yes"<br>Ask from where you received the treatment?                                                                                                                          | 1=SAM corner<br>2=MBBS doctor<br>3=CHCP/community clinic<br>99=Others (specify bellow).....                                                   |                                                                                                                             |    |      |                                                 |
| 413 | CM_413   | Sickness outcome?                                                                                                                                                                      | 1= Cured<br>2= Non-recovered<br>3= The treatment was not completed<br>4= Others (specify bellow).....                                         |                                                                                                                             |    |      |                                                 |

#### Section 5: Child Anthropometry

| No. | Variable | Question | Response(s) | Code | Instructions |
|-----|----------|----------|-------------|------|--------------|
|-----|----------|----------|-------------|------|--------------|

| No. | Variable | Question                                | Response(s)                                                                                                                                                                                            | Code | Instructions     |
|-----|----------|-----------------------------------------|--------------------------------------------------------------------------------------------------------------------------------------------------------------------------------------------------------|------|------------------|
| 501 | CA_501   | Start Time Anthropometry                | <div> <div> <div></div> <div></div> </div> <div> <div></div> <div></div> </div> <div>:</div> <div> <div></div> <div></div> </div> <div> <div></div> <div></div> </div> </div> <div>Hour : Minute</div> |      | Use 24 Hr Format |
| 502 | CA_502   | Weight Scale ID                         | <div> <div></div> <div></div> </div> <div> <div></div> <div></div> </div>                                                                                                                              |      |                  |
| 503 | CA_5403  | Height/length Scale ID                  | <div> <div></div> <div></div> </div> <div> <div></div> <div></div> </div>                                                                                                                              |      |                  |
| 504 | CA_504   | Clothing type during weight measurement | 1 = Light clothing<br>2 = Slightly heavy clothing<br>3 = Heavy clothing                                                                                                                                |      |                  |
| 505 | CA_505   | Name of measurer                        |                                                                                                                                                                                                        |      |                  |
| 506 | CA_506   | Code of Measurer                        | <div> <div></div> <div></div> </div> <div> <div></div> <div></div> </div>                                                                                                                              |      |                  |

| No  | Variable        | Measurement                                | Measurement 1                                                | Measurement 2 | Measurement 3                                                                                      |
|-----|-----------------|--------------------------------------------|--------------------------------------------------------------|---------------|----------------------------------------------------------------------------------------------------|
| 507 | CA_507<br>A/B/C | Weight(Kg)                                 | A.         .                                                 | B.         .  | C.         .      <br>If A and B differs more than<br>0.05 Kg, take<br>3 <sup>rd</sup> measurement |
| 508 | CA_508<br>A/B/C | Left hand<br>circumference(MUAC)<br>(Cm)   | A.         .                                                 | B.         .  | C.         .      <br>If A and B differs more than<br>0.5<br>cm, take 3 <sup>rd</sup> measurement  |
| 509 | CA_509<br>A/B/C | Length(Cm)                                 | A.         .                                                 | B.         .  | C.         .      <br>If A and B differs more than<br>0.5<br>cm, take 3 <sup>rd</sup> measurement  |
| 510 | CA_510          | Length/height measured in system           | 1 = Standing position<br>2 = Recumbent position              |               |                                                                                                    |
| 511 | CA_511          | Edema                                      | 1 = Yes   2 = No   77 =<br>Don't know                        |               |                                                                                                    |
| 512 | CA_512          | Is the child co-operative                  | 1 = Cooperative<br>2 = Non-cooperative<br>88= Not applicable |               |                                                                                                    |
| 513 | CA_513          | Interviewers comments about<br>measurement |                                                              |               |                                                                                                    |
|     |                 |                                            |                                                              |               |                                                                                                    |
|     |                 |                                            |                                                              |               |                                                                                                    |
| 514 | CA_514          | End Time of measurement                    | :        <br>Hr : Min                                        |               | Use 24 hr format                                                                                   |

## Section 6: Referral

| No.                                                                                                                                                                       | Variable                  | Question                | Responses and code categories                                                                                                                   | Code | Instructions                  |
|---------------------------------------------------------------------------------------------------------------------------------------------------------------------------|---------------------------|-------------------------|-------------------------------------------------------------------------------------------------------------------------------------------------|------|-------------------------------|
| 601                                                                                                                                                                       | CA_601                    | Was the child referred? | 1 = Yes    2 = No                                                                                                                               |      | If 'No', Skip to next section |
| 602                                                                                                                                                                       | CA_602<br>A/B/C<br>/D/E/F | Reason of referral      | A.  ____ ____     B.  ____ ____ <br>C.  ____ ____  D.  ____ ____     E.  ____ ____ <br>F.  ____ ____                                            |      | Multiple reasons possible     |
| <b>Cause of referral code</b> : 1= Weight for height Z score <- 2; 2= Weight for height Z score <- 3; 3= MUAC 12.4-11.5 cm; 4= MUAC <11.5 cm; 99 = Others (Specify) _____ |                           |                         |                                                                                                                                                 |      |                               |
| 603                                                                                                                                                                       | CA_603                    | Where referred?         | 1= Upazilla Health Complex<br>2= District Hospital<br>3= Medical College Hospital<br>4= Doctor's private chamber<br>99 = Others (Specify) _____ |      |                               |

## Section 1: General Information

82

82

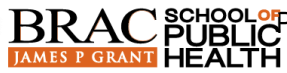[illegible]

| No | Variable | Question | Response Options                                                                                                  | Code | Instructions/<br>Skip |
|----|----------|----------|-------------------------------------------------------------------------------------------------------------------|------|-----------------------|
|    |          |          | 17 =Spinach vegetable<br>18=Fishery<br>19 = Homemaker<br>20= Student<br>77 = Don,t know<br>66 =Age below 06 years |      |                       |

## Page 25 of 82

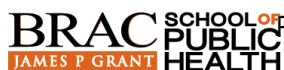

National Nutrition Surveillance (NNS)

Page 26 of 82



National Nutrition Surveillance (NNS)

| No  | Variable          | Question                     | Yesterday during the day or night, did your child consume the following food items? (A)                                  | During the last 07 days how many days did your child consume the following food items (B) | During the last 07 dayshow many times did your child consume the following food items (C)            |
|-----|-------------------|------------------------------|--------------------------------------------------------------------------------------------------------------------------|-------------------------------------------------------------------------------------------|------------------------------------------------------------------------------------------------------|
|     |                   |                              | condensed milk,tiler khaza                                                                                               |                                                                                           |                                                                                                      |
| 222 | ABD_22<br>2 A/B/C | Miscellaneous (Sweet drinks) | Tea with suger, soft drinks, juice, energy drinks,yogurt drinks,chocolate drinks, horlicks,moltova                       | 1 = Yes<br>2 = No                                                                         | <input type="text"/> <input type="text"/> <input type="text"/><br>days<br><input type="text"/> times |
| 223 | ABD_22<br>3 A/B/C | Other beverages and foods    | Tea or coffee if not sweetened, clear broth, alcohol, Pickles, olives and similar                                        | 1 = Yes<br>2 = No                                                                         | <input type="text"/> <input type="text"/> <input type="text"/><br>days<br><input type="text"/> times |
| 224 | ABD_22<br>4 A/B/C | Condiments /spices           | Spices, coriander leaves, sausage, garlic, ketchup, lemon juice, mint leaves, drinks, betel leaves, tobacco leaves, jars | 1 = Yes<br>2 = No                                                                         | <input type="text"/> <input type="text"/> <input type="text"/><br>days<br><input type="text"/> times |



## National Nutrition Surveillance (NNS)

The next, I will ask about the **fruits** and **vegetables** that you usually eat; I have a nutrition card/picture here that shows you some examples of local fruits and vegetables; Each picture represents the size of a serving; To answer these questions, please think of a typical week. (If 1-2 times/month then record it as "00.")

## Page 28 of 82

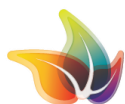

| bṁ^i                                                                                                            | m~PK    | cÖkœ                                                                                                                                                                                                                                                                                                                                                                                                                                                                                                                                                                                                                                                                                                                                                                                                 | DĖi                                                                                                                                         | ‡KvW | wb‡'©kbv |
|-----------------------------------------------------------------------------------------------------------------|---------|------------------------------------------------------------------------------------------------------------------------------------------------------------------------------------------------------------------------------------------------------------------------------------------------------------------------------------------------------------------------------------------------------------------------------------------------------------------------------------------------------------------------------------------------------------------------------------------------------------------------------------------------------------------------------------------------------------------------------------------------------------------------------------------------------|---------------------------------------------------------------------------------------------------------------------------------------------|------|----------|
| <b>g~jt Zvgv‡Ki e'envi</b>                                                                                      |         |                                                                                                                                                                                                                                                                                                                                                                                                                                                                                                                                                                                                                                                                                                                                                                                                      |                                                                                                                                             |      |          |
| GLb Avwg Avcbv‡K ZvgvK I ZvgvKRvZ `^te'i (†hgbt a~gcvb, †avuqvwenxb Zvgv‡Ki) e'envi mṁú‡K© wKQz cÖkœ wRÄvmv Kie |         |                                                                                                                                                                                                                                                                                                                                                                                                                                                                                                                                                                                                                                                                                                                                                                                                      |                                                                                                                                             |      |          |
| 301                                                                                                             | ABR_301 | Do you <u>currently</u> smoke any tobacco products, such as cigarettes, <i>bidis</i> , <i>hookah</i> , <i>cigars</i> or pipes?<br><br><i>Instruction: Demonstrate show card to the participant and ask which smoke tobacco products/he use. [USE SHOWCARD]</i>                                                                                                                                                                                                                                                                                                                                                                                                                                                                                                                                       | 1 = Yes; 2= No<br>If No, go to ABR_304                                                                                                      |      |          |
| 302                                                                                                             | ABR_302 | Do you <u>currently</u> smoke tobacco products <u>daily</u> ?<br><br><i>Instruction: This question is applicable for those respondents who smoke tobacco product daily. Daily means "tobacco smoking is at least one time/day for almost one month or more than that. If that is the case respondent started somoking from 25 days and still running, that is regarded as everyday."</i>                                                                                                                                                                                                                                                                                                                                                                                                             | 1 = Yes; 2= No                                                                                                                              |      |          |
| 303                                                                                                             | ABR_303 | How old were you when you <b>first started</b> smoking?                                                                                                                                                                                                                                                                                                                                                                                                                                                                                                                                                                                                                                                                                                                                              | Age [ ] [ ] years<br>77 = Don't know                                                                                                        |      |          |
| 304                                                                                                             | ABR_304 | Do you currently use any smokeless tobacco products such as Betel quid with zarda, zarda only or zarda with supari, Betel quid with sadapata, pan masala with tobacco, sadapata chewing, gul, Khoinee, Nossi, gutka?<br><i>Instruction: Ask respondent to think and answer whether h/she use any smokeless tobacco products such as Betel quid with zarda, zarda only or zarda with supari, Betel quid with sadapata, pan masala with tobacco, sadapata chewing, gul, Khoinee, Nossi, gutka. Here, only betel quid, supari and lime will not be considered. It will be considered as smokeless tobacco if respondent use Betel quid with zarda, zarda only or zarda with supari, Betel quid with sadapata, pan masala with tobacco, sadapata chewing, gul, Khoinee, Nossi, gutka. [USE SHOWCARD]</i> | 1 = Yes; 2= No<br><br>If No, go to ABR_307                                                                                                  |      |          |
| 305                                                                                                             | ABR_305 | Do you <u>currently</u> use <u>smokeless tobacco</u> <u>daily</u> ?<br><i>Instruction: Daily means "using smokeless tobacco is at least one time/day for almost one month or more than that. If that is the case respondent started somoking from 25 days and still running, that is regarded as everyday."</i>                                                                                                                                                                                                                                                                                                                                                                                                                                                                                      | 1 = Yes; 2= No                                                                                                                              |      |          |
| 306                                                                                                             | ABR_306 | How old were you when you started smokeless tobacco?                                                                                                                                                                                                                                                                                                                                                                                                                                                                                                                                                                                                                                                                                                                                                 | Age [ ] [ ] years<br>77 = Don't know                                                                                                        |      |          |
| 307                                                                                                             | ABR_307 | Which of your parents or guardians use any form of tobacco?                                                                                                                                                                                                                                                                                                                                                                                                                                                                                                                                                                                                                                                                                                                                          | 1= Neither<br>2= My father or male guardian<br>3= My mother or female guardian<br>4= Both<br>5= I do not know<br>99= Others (Specify) _____ |      |          |
| <b>Physical activity</b>                                                                                        |         |                                                                                                                                                                                                                                                                                                                                                                                                                                                                                                                                                                                                                                                                                                                                                                                                      |                                                                                                                                             |      |          |



Think first about the time you spend doing work. Think of work as the things that you have to do such as paid or unpaid work, study/training, household chores, harvesting food/crops, fishing or hunting for food, seeking employment. [Insert other examples if needed]. In answering the following questions 'vigorous-intensity activities' are activities that require hard physical effort and cause large increases in breathing or heart rate, 'moderate-intensity activities' are activities that require moderate physical effort and cause small increases in breathing or heart rate.

*Do not forget to demonstrate show card to the respondent which will help them to respond.*

**Vigorous intensity activity:** Such kind of physical activity that causes large increases in breathing or heart rate.

Now I would like to know about the 'Vigorous-intensity activities' you perform

'Vigorous-intensity activities' performed as a part of daily work / professional work/ outside daily work / professional work.

|     |         |                                                                                                                                                                                                                                                                                                                                                                                                                                                                                                                                                                                                                                                                                                                                           |                                                                                       |  |  |
|-----|---------|-------------------------------------------------------------------------------------------------------------------------------------------------------------------------------------------------------------------------------------------------------------------------------------------------------------------------------------------------------------------------------------------------------------------------------------------------------------------------------------------------------------------------------------------------------------------------------------------------------------------------------------------------------------------------------------------------------------------------------------------|---------------------------------------------------------------------------------------|--|--|
| 308 | ABR_308 | <p>Does your daily work / professional work, sports, fitness or recreational(leisure) activities involve <u>vigorous-intensity activity</u> that causes large increases in breathing or heart rate like [carrying or lifting heavy loads, digging or construction work, harvesting paddy, fishing using net, running, football, Kabaddi, Dariabandha, Gollachut etc.] <u>for at least 10 minutes continuously?</u></p> <p><b>Instruction:</b> Ask participant to think about those <u>vigorous-intensity activities performed as a part of professional work/ recreational activities. Those activities will be considered as vigorous-intensity activities that causes large increase in breathing or heart rate.</u> [USE SHOWCARD]</p> | <p>1 = Yes      2 = No</p> <p>[If 'No', please go to 311]</p>                         |  |  |
| 309 | ABR_309 | <p>In a typical week, on how many days do you do <u>vigorous- intensity activities/sports/fitness</u> as part of <u>daily work / professional work/ recreational activities?</u></p> <p><b>Instruction:</b> In a typical week refers to “activities performed by respondent in a typical week”. Valid response range is 1-7 days.</p>                                                                                                                                                                                                                                                                                                                                                                                                     | <p>____ Day</p> <p>77 = Don't know</p> <p>[If 'Don't know', please go to ABR_311]</p> |  |  |
| 310 | ABR_310 | <p>How much time do you spend doing <u>vigorous-intensity activities/sports/fitness</u> at <u>daily work / professional work/recreational activities</u> on a typical day?</p> <p><b>Instruction:</b> Ask respondent to think about a single day (which can be remembered easily) s/he performed <u>vigorous-intensity activities as part of professional work/ recreational activities.</u> Respondent will consider only those activities that are performed for at least 10 minutes or more continuously. Check unusual (more than 04 hours) values.</p>                                                                                                                                                                               | <p>_____</p> <p>Minutes</p>                                                           |  |  |

'Moderate-intensity activity' performed as a part of daily work / professional work



|                                                                                                                                                                                                                                                                                                                                 |         |                                                                                                                                                                                                                                                                                                                                                                                                                                                                                                                                                                                                                           |                                                                        |  |  |
|---------------------------------------------------------------------------------------------------------------------------------------------------------------------------------------------------------------------------------------------------------------------------------------------------------------------------------|---------|---------------------------------------------------------------------------------------------------------------------------------------------------------------------------------------------------------------------------------------------------------------------------------------------------------------------------------------------------------------------------------------------------------------------------------------------------------------------------------------------------------------------------------------------------------------------------------------------------------------------------|------------------------------------------------------------------------|--|--|
| 311                                                                                                                                                                                                                                                                                                                             | ABR_311 | Does your <u>daily work / professional work/ spots/fitness/ recreational (leisure) work</u> involve <u>moderate-intensity activity</u> that causes small increases in breathing or heart rate such as brisk walking [or carrying light loads, cycling, swimming, volleyball] for at least 10 minutes continuously?<br><b>Instruction:</b> Ask participant to think about those moderate-intensity activities performed as a part of professional work/ recreational activities. Those activities will be considered as moderate-intensity activities that causes small increase in breathing or heart rate. [USESHOWCARD] | 1 = Yes    2 = No<br>[If 'No', please go to ABR_314]                   |  |  |
| 312                                                                                                                                                                                                                                                                                                                             | ABR_312 | In a typical week, on how many days do you do <u>moderate- intensity activities</u> as part of your <u>daily work / professional work/sports/fitness or recreational work</u> ?<br><b>Instruction:</b> In a typical week refers to "activities done by respondent in a typical week". Valid response range is 1-7 days.                                                                                                                                                                                                                                                                                                   | ____ Day<br>77 = Don't know<br>[If 'Don't know', please go to ABR_314] |  |  |
| 313                                                                                                                                                                                                                                                                                                                             | ABR_313 | How much time do you spend doing <u>moderate-intensity activities</u> at <u>daily work / professional work/ sports/fitness or recreational work</u> on a typical day?<br><b>Instruction:</b> Ask respondent to think about a single day (which can be remembered easily) s/he performed moderate-intensity activities as part of professional work/recreational activities. Respondent will consider only those activities that are performed for at least 10 minutes or more continuously. Check unusual (more than 04 hours) values.                                                                                    | _____<br>Minutes                                                       |  |  |
| <b>Sedentary behavior</b> The following question is about sitting or reclining at work, at home, getting to and from places, or with friends including time spent sitting at a desk, sitting with friends, traveling in car, bus, train, reading, playing cards or watching television, but do not include time spent sleeping. |         |                                                                                                                                                                                                                                                                                                                                                                                                                                                                                                                                                                                                                           |                                                                        |  |  |
| 314                                                                                                                                                                                                                                                                                                                             | ABR_314 | How much time do you usually spend sitting or reclining on a typical day?<br><b>Instruction:</b> Ask respondent to think about time spent on sitting or reclining at work, office, study, watching television, computer use, at kitchen, during rest. Do not include time spent during sleeping.                                                                                                                                                                                                                                                                                                                          | _____<br>Minutes                                                       |  |  |
| 315                                                                                                                                                                                                                                                                                                                             | ABR_315 | How much time do you watch television daily?                                                                                                                                                                                                                                                                                                                                                                                                                                                                                                                                                                              | _____<br>Minutes                                                       |  |  |

#### Section 4: Mental Health

| No                                                                     | Variable | Question                                      | Response Options                                                 | Code | Instructions |
|------------------------------------------------------------------------|----------|-----------------------------------------------|------------------------------------------------------------------|------|--------------|
| Over the last 2 weeks how often you have faced the following problems? |          |                                               |                                                                  |      |              |
| 401                                                                    | ABM_401  | Less interest or less joy to do something     | 0=Not at all<br>1=Some time<br>2=Most of the time<br>3= All time |      |              |
| 402                                                                    | ABM_402  | Feeling Upset, depressed, irritable, hopeless | 0=Not at all<br>1=Some time<br>2=Most of the time<br>3= All time |      |              |
| 403                                                                    | ABM_403  | Difficulty to sleeping or sleeping too much   | 0=Not at all<br>1=Some time                                      |      |              |

| No                                                                     | Variable | Question                                                                                                                              | Response Options                                                 | Code | Instructions           |
|------------------------------------------------------------------------|----------|---------------------------------------------------------------------------------------------------------------------------------------|------------------------------------------------------------------|------|------------------------|
| Over the last 2 weeks how often you have faced the following problems? |          |                                                                                                                                       |                                                                  |      |                        |
|                                                                        |          |                                                                                                                                       | 2=Most of the time<br>3= All time                                |      |                        |
| 404                                                                    | ABM_404  | Tired or low strength                                                                                                                 | 0=Not at all<br>1=Some time<br>2=Most of the time<br>3= All time |      |                        |
| 405                                                                    | ABM_405  | Loss of appetite,weight loss or eat more                                                                                              | 0=Not at all<br>1=Some time<br>2=Most of the time<br>3= All time |      |                        |
| 406                                                                    | ABM_406  | Have a bad feeling about self, feel self as a failure, Making myself or my family smaller feel like this                              | 0=Not at all<br>1=Some time<br>2=Most of the time<br>3= All time |      |                        |
| 407                                                                    | ABM_407  | Difficulty to concentrate at the time of work at school,read something or watch television                                            | 0=Not at all<br>1=Some time<br>2=Most of the time<br>3= All time |      |                        |
| 408                                                                    | ABM_408  | Talk so lightly or move around that others might notice or the opposite of this that means more severity or more movement than usual. | 0=Not at all<br>1=Some time<br>2=Most of the time<br>3= All time |      |                        |
| 409                                                                    | ABM_409  | It is better to die or hit yourself in any way feel like this                                                                         | 0=Not at all<br>1=Some time<br>2=Most of the time<br>3= All time |      | If "0" go to section 5 |

## Referral

| No  | Variable | Question                     | Response Options                                                                                                                          | Code | Instructions                  |
|-----|----------|------------------------------|-------------------------------------------------------------------------------------------------------------------------------------------|------|-------------------------------|
| 410 | ABM_410  | Was the adolescent referred? | 1 = Yes    2 = No                                                                                                                         |      | If 'No', Skip to next section |
| 411 | ABM_411  | Where referred?              | 1= Upazilla Health Complex<br>2= District Hospital<br>3= Medical College Hospital<br>4= Doctor's private chamber<br>99 = Others (Specify) |      |                               |

## Section 5: Anthropometry

| No  | Variable    | Question                                | Responses and code categories                                                                 | Code          | Instructions     |
|-----|-------------|-----------------------------------------|-----------------------------------------------------------------------------------------------|---------------|------------------|
| 501 | ABA_501     | Start Time of anthropometry             | <div> <div></div> <div></div> <div>:</div> <div></div> <div></div> </div> <div>Hr : Min</div> |               | Use 24 hr format |
| 502 | ABA_502     | Weight Scale ID                         | <div> <div></div> <div></div> <div></div> </div>                                              |               |                  |
| 503 | ABA_503     | Height Scale ID                         | <div> <div></div> <div></div> <div></div> </div>                                              |               |                  |
| 504 | ABA_504     | Clothing type during weight measurement | 1 = Light clothing<br>2 = Slightly heavy clothing<br>3 = Heavy clothing                       |               |                  |
| 505 | ABA_505     | Name of measurer                        |                                                                                               |               |                  |
| 506 | ABA_506     | Code of measurer                        | <div> <div></div> <div></div> <div></div> </div>                                              |               |                  |
| No  | Measurement | Measurement 1                           | Measurement 2                                                                                 | Measurement 3 |                  |



| No  | Variable      | Question                 | Responses and code categories                         | Code                       | Instructions                                              |
|-----|---------------|--------------------------|-------------------------------------------------------|----------------------------|-----------------------------------------------------------|
| 507 | ABA_507 A/B/C | Height (Cm)              | A. [ ] [ ] [ ] [ ] [ ] [ ] B. [ ] [ ] [ ] [ ] [ ] [ ] | C. [ ] [ ] [ ] [ ] [ ] [ ] | If A and B differs more than 0.5cm, take 3rd measurement  |
| 508 | ABA_508 A/B/C | Weight (Kg)              | A. [ ] [ ] [ ] [ ] [ ] [ ] B. [ ] [ ] [ ] [ ] [ ] [ ] | C. [ ] [ ] [ ] [ ] [ ] [ ] | If A and B differs more than 0.1kg, take 3rd measurement  |
| 509 | ABA_509A/B/C  | Fat%                     | A. [ ] [ ] [ ] [ ] [ ] [ ] B. [ ] [ ] [ ] [ ] [ ] [ ] |                            |                                                           |
| 510 | ABA_510A/B/C  | Water%                   | A. [ ] [ ] [ ] [ ] [ ] [ ] B. [ ] [ ] [ ] [ ] [ ] [ ] |                            |                                                           |
| 511 | ABA_511 A/B/C | Waist circumference (Cm) | A. [ ] [ ] [ ] [ ] [ ] [ ] B. [ ] [ ] [ ] [ ] [ ] [ ] | C. [ ] [ ] [ ] [ ] [ ] [ ] | If A and B differs more than 0.5 cm, take 3rd measurement |
| 512 | ABA_512       | Comment                  |                                                       |                            |                                                           |
| 513 | ABA_513       | End Time of measurement  | [ ] [ ] [ ] [ ] [ ] [ ]<br>Hr : Min                   |                            | Use 24 hr format                                          |

#### Module 5: Adolescent Girls Module

##### Section 1: General Information

| No  | Variable | Question                                                                                                                                                                                                                                                                   | Response Options                                                                                                                                                                                                                        | Code | Instructions/Skip |
|-----|----------|----------------------------------------------------------------------------------------------------------------------------------------------------------------------------------------------------------------------------------------------------------------------------|-----------------------------------------------------------------------------------------------------------------------------------------------------------------------------------------------------------------------------------------|------|-------------------|
| 101 | AG_101   | What's your name?(with nick name)                                                                                                                                                                                                                                          | _____                                                                                                                                                                                                                                   |      |                   |
| 102 | AG_102   | What's your date of birth                                                                                                                                                                                                                                                  | [ ] [ ] [ ] [ ] [ ] [ ] / [ ] [ ] [ ] [ ] [ ] [ ] / 20 [ ] [ ] [ ] [ ]<br>DD / MM / YYYY                                                                                                                                                |      |                   |
| 103 | AG_103   | Age of the respondent<br>(Write complete year)                                                                                                                                                                                                                             | [ ] [ ] [ ] year                                                                                                                                                                                                                        |      |                   |
| 104 | AG_104   | What is your marital status?                                                                                                                                                                                                                                               | 1 = Never married<br>2 = Currently married<br>3 = Separated<br>4 = Divorced<br>5 = Widowed<br>88 = Refused                                                                                                                              |      |                   |
| 105 | AG_105   | Completed years of education the respondent completed<br><br>[Instruction: Write down in total, the years the respondent spent in school for formal education (Is completed years) [Excluding pre-school and informal education). Write down "00" if no formal education.] | [ ] [ ] [ ] Years<br><br><ul style="list-style-type: none"> <li>Primary/Ebtedayee=5</li> <li>Secondary/Dakhil=10</li> <li>Higher secondary/ Diploma/Alim=12</li> <li>Graduate/Fazil=16</li> <li>Post graduate/kamil/dawra=18</li> </ul> |      |                   |
| 106 | AG_106   | Occupation of the respondent(adolescent name) over the past 12 months<br>If the participant has been                                                                                                                                                                       | 1 = Agricultural work(paddy)<br>2 = Agricultural work(without paddy)<br>3 = Agricultural day labor<br>4 = Un skild day labor<br>5 = Skiled day labor                                                                                    |      |                   |



| No  | Variable | Question                                                                                                                                                                                                                                                                                                         | Response Options                                                                                                                                                                                                                                                                                                                                                                                                                                                                                                                      | Code | Instructions/Skip |
|-----|----------|------------------------------------------------------------------------------------------------------------------------------------------------------------------------------------------------------------------------------------------------------------------------------------------------------------------|---------------------------------------------------------------------------------------------------------------------------------------------------------------------------------------------------------------------------------------------------------------------------------------------------------------------------------------------------------------------------------------------------------------------------------------------------------------------------------------------------------------------------------------|------|-------------------|
|     |          | employed more than one occupation in the last 12 months, consider the profession that he has spent most of his time as the main occupation and write it down                                                                                                                                                     | 6= Driver of Rickshaw/ van/Wheel barrow/Baby taxi/ Boatman<br>7=Fisherman<br>8=Employer<br>9=Profesionals<br>10=Businessman<br>11= Petty businessman<br>12= House maid<br>13=Zoom fermar<br>14= Do not earn<br>15=Poultry/dairy fermar<br>16=Handicrafts<br>17 =Spinach vegetable<br>18=Fishery<br>19 = Homemaker<br>20= Student<br>77 = Don,t know<br>66 =Age below 06 years                                                                                                                                                         |      |                   |
| 107 | AG_107   | Completed years of education of the mother of the respondent (adolescent girls name)<br><br><i>[Instruction: Write down in total, the years the respondent spent in school for formal education (Is completed years) [Excluding pre-school and informal education). Write down "00" if no formal education.]</i> | <div style="text-align: center;"> <div style="border-bottom: 1px solid black; width: 20px; display: inline-block;"></div> <div style="border-bottom: 1px solid black; width: 20px; display: inline-block;"></div>           Years         </div> <ul style="list-style-type: none"> <li>• Primary/Ebtedayee=5</li> <li>• Secondary/Dakhil=10</li> <li>• Higher Secondary/Diploma/Alim=12</li> <li>• Graduate/Fazil=16</li> <li>• Post graduate/kamil/dawra=18</li> </ul>                                                              |      |                   |
| 108 | AG_108   | Mother's occupation of the respondent(adolescent name) over the past 12 months<br>If the participant has been employed more than one occupation in the last 12 months, consider the profession that he has spent most of his time as the main occupation and write it down                                       | 1 = Agricultural work(paddy)<br>2 = Agricultural work(without paddy)<br>3 = Agricultural day labor<br>4 = Un skild day labor<br>5 = Skiled day labor<br>6= Driver of Rickshaw/ van/Wheel barrow/Baby taxi/ Boatman<br>7=Fisherman<br>8=Employer<br>9=Profesionals<br>10=Businessman<br>11= Petty businessman<br>12= House maid<br>13=Zoom fermar<br>14= Do not earn<br>15=Poultry/dairy fermar<br>16=Handicrafts<br>17 =Spinach vegetable<br>18=Fishery<br>19 = Homemaker<br>20= Student<br>77 = Don,t know<br>66 =Age below 06 years |      |                   |

## Section 2: Dietary diversity

82

**Record first the answer of the questions of column A. collect the answer for column B/C after recording the answer of the questions of column A.**

82



## National Nutrition Surveillance (NNS)

| No | Variable | Question | Response Options | Code | Instructions/ Skip |
|----|----------|----------|------------------|------|--------------------|
|----|----------|----------|------------------|------|--------------------|

The next questions I will ask about the **fruits** and **vegetables** that you usually eat; I have a nutrition card/picture here that shows you some examples of local fruits and vegetables; Each picture represents the size of a serving; To answer these questions, please think of a typical week. (If 1-2 times/month then record it as "00.")

Section 3: Behavioral risk factor (Smoking/smokeless tobacco physical activity)Version 1.0/ 31 April 2019



**Physical activity**

Next I am going to ask you about the time you spend doing different types of physical activity in a typical week. Please answer these questions even if you do not consider yourself to be a physically active person.

Think first about the time you spend doing work. Think of work as the things that you have to do such as paid or unpaid work, study/training, household chores, harvesting food/crops, fishing or hunting for food, seeking employment. [Insert other examples if needed]. In answering the following questions 'vigorous-intensity activities' are activities that require hard physical effort and cause large increases in breathing or heart rate, 'moderate-intensity activities' are activities that require moderate physical effort and cause small increases in breathing or heart rate.

***Instruction:*** Please read out the above statement for respondent. Do not drop this part. At first respondent will must think about his/her daily activities (Paid or unpaid work, study/training, household chores, harvesting food/crops, fishing or hunting for food, seeking employment). Then will think time for travelling from one place to another and at last time spent during leisure period.

*Do not forget to demonstrate show card to the respondent which will help them to respond.*

*It is needed to let participant remember when answer the following things*

***Vigorous intensity activity:*** Such kind of physical activity that causes large increases in breathing or heart rate.

***Moderate-intensity activity:*** Such kind of physical activity that causes small increases in breathing or heart rate.

Now I would like to know about the 'Vigorous-intensity activities' you perform



|                                                                                                                                |         |                                                                                                                                                                                                                                                                                                                                                                                                                                                                                                                                                                                                                                                                                                                         |                                                                        |  |  |
|--------------------------------------------------------------------------------------------------------------------------------|---------|-------------------------------------------------------------------------------------------------------------------------------------------------------------------------------------------------------------------------------------------------------------------------------------------------------------------------------------------------------------------------------------------------------------------------------------------------------------------------------------------------------------------------------------------------------------------------------------------------------------------------------------------------------------------------------------------------------------------------|------------------------------------------------------------------------|--|--|
| 'Vigorous-intensity activities' performed as a part of daily work / professional work/ outside daily work / professional work. |         |                                                                                                                                                                                                                                                                                                                                                                                                                                                                                                                                                                                                                                                                                                                         |                                                                        |  |  |
| 308                                                                                                                            | AGR_308 | Does your daily work / professional work, sports, fitness or recreational(leisure) activities involve <u>vigorous-intensity activity</u> that causes large increases in breathing or heart rate like [carrying or lifting heavy loads, digging or construction work, harvesting paddy, fishing using net, running, football, Kabaddi, Dariabandha, Gollachut etc.] for at least 10 minutes continuously?<br><b>Instruction:</b> Ask participant to think about those <u>vigorous-intensity activities performed as a part of professional work/ recreational activities. Those activities will be considered as vigorous-intensity activities that causes large increase in breathing or heart rate.</u> [USE SHOWCARD] | 1 = Yes    2 = No<br>[If 'No', please go to 311]                       |  |  |
| 309                                                                                                                            | AGR_309 | In a typical week, on how many days do you do <u>vigorous- intensity activities/sports/fitness</u> as part of <u>daily work / professional work/ recreational activities</u> ?<br><b>Instruction:</b> In a typical week refers to "activities performed by respondent in a typical week". Valid response range is 1-7 days.                                                                                                                                                                                                                                                                                                                                                                                             | ____ Day<br>77 = Don't know<br>[If 'Don't know', please go to ABR_311] |  |  |
| 310                                                                                                                            | AGR_310 | <u>How much time</u> do you spend doing <u>vigorous-intensity activities/sports/fitness</u> at <u>daily work / professional work/recreational activities</u> on a typical day?<br><b>Instruction:</b> Ask respondent to think about a single day (which can be remembered easily) s/he performed <u>vigorous-intensity activities as part of professional work/ recreational activities.</u> Respondent will consider only those activities that are performed for at least 10 minutes or more continuously. Check unusual (more than 04 hours) values.                                                                                                                                                                 | _____<br>Minutes                                                       |  |  |
| Now I would like to know about the 'Moderate-intensity activity' you perform                                                   |         |                                                                                                                                                                                                                                                                                                                                                                                                                                                                                                                                                                                                                                                                                                                         |                                                                        |  |  |
| 'Moderate-intensity activity' performed as a part of daily work / professional work                                            |         |                                                                                                                                                                                                                                                                                                                                                                                                                                                                                                                                                                                                                                                                                                                         |                                                                        |  |  |
| 311                                                                                                                            | AGR_311 | Does your <u>daily work / professional work/ spots/fitness/ recreational (leisure) work</u> involve <u>moderate-intensity activity</u> that causes small increases in breathing or heart rate such as brisk walking [or carrying light loads, cycling, swimming, volleyball] for at least 10 minutes continuously?<br><b>Instruction:</b> Ask participant to think about those <u>moderate-intensity activities performed as a part of professional work/ recreational activities. Those activities will be considered as moderate-intensity activities that causes small increase in breathing or heart rate.</u> [USE SHOWCARD]                                                                                       | 1 = Yes    2 = No<br>[If 'No', please go to ABR_314]                   |  |  |
| 312                                                                                                                            | AGR_312 | In a typical week, on how many days do you do <u>moderate- intensity activities</u> as part of your <u>daily work / professional work/sports/fitness or recreational work</u> ?<br><b>Instruction:</b> In a typical week refers to "activities done by respondent in a typical week". Valid response range is 1-7 days.                                                                                                                                                                                                                                                                                                                                                                                                 | ____ Day<br>77 = Don't know<br>[If 'Don't know', please go to ABR_314] |  |  |

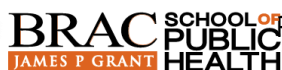

**Sedentary behavior** The following question is about sitting or reclining at work, at home, getting to and from places, or with friends including time spent sitting at a desk, sitting with friends, traveling in car, bus, train, reading, playing cards or watching television, but do not include time spent sleeping.

| No                                                                                                                           | Variable | Question                                                                                                 | Response Options                                                                                             | Code | Instructions/<br>Skip         |
|------------------------------------------------------------------------------------------------------------------------------|----------|----------------------------------------------------------------------------------------------------------|--------------------------------------------------------------------------------------------------------------|------|-------------------------------|
| 401                                                                                                                          | AGM_401  | When your menarche started?                                                                              | <u>    </u> years                                                                                            |      | Write "00" if not started yet |
| 402                                                                                                                          | AGM_402  | What is your marital status?                                                                             | 1 = Never married<br>2 = Currently married<br>3 = Separated;<br>4 = Divorced<br>5 = Widowed;<br>88 = Refused |      | If answer 1, go to 40         |
| 403                                                                                                                          | AGM_403  | How many times you became pregnant in your life?<br>(Including abortion, MR, stillbirth and live birth)? | <u>    </u> Times                                                                                            |      | If "0" go to section 5        |
| 404                                                                                                                          | AGM_404  | Are you pregnant now?                                                                                    | 1 = Yes      2=No<br>8=Unsure                                                                                |      |                               |
| Menstrual Hygiene (Please ask the following questions if menarche/period started, if not then skip to anthropometry section) |          |                                                                                                          |                                                                                                              |      |                               |
| 405                                                                                                                          | AGM_405  | What material do you use during period/menstruation? Did you                                             | 1= Sanitary pad<br>2= Old cloth<br>3= New Cloth<br>99= Others(Specify)                                       |      |                               |

| No  | Variable | Question                                                            | Response Options                                                                                                                                                                                                                                                                                                                                                                                                                                                                                     | Code | Instructions            |
|-----|----------|---------------------------------------------------------------------|------------------------------------------------------------------------------------------------------------------------------------------------------------------------------------------------------------------------------------------------------------------------------------------------------------------------------------------------------------------------------------------------------------------------------------------------------------------------------------------------------|------|-------------------------|
| 501 | AGH_501  | Did You deliver any live birth or stillbirth in the last 24 months? | 1=Yes 2=No                                                                                                                                                                                                                                                                                                                                                                                                                                                                                           |      | If "No" go to section 6 |
| 502 | AGH_502  | Date of delivery of live birth or still birth.                      | <div> <div> <div> <div></div> <div></div> <div></div> </div> <div> <div></div> <div></div> <div></div> </div> <div> <div></div> <div></div> <div></div> </div> </div> <div>/</div> <div> <div> <div></div> <div></div> <div></div> </div> <div> <div></div> <div></div> <div></div> </div> <div> <div></div> <div></div> <div></div> </div> </div> <div>/20</div> <div> <div></div> <div></div> <div></div> </div> <div> <div></div> <div></div> <div></div> </div> </div> <div>Day/Month/Year</div> |      |                         |



## National Nutrition Surveillance (NNS)

Page 43 of 82



| No                                                  | Variable | Question                                                                                                                                                                                                                                                                                                                                                                                                                    | Response Options                                                 | Code | Instructions                         |
|-----------------------------------------------------|----------|-----------------------------------------------------------------------------------------------------------------------------------------------------------------------------------------------------------------------------------------------------------------------------------------------------------------------------------------------------------------------------------------------------------------------------|------------------------------------------------------------------|------|--------------------------------------|
|                                                     |          | Centre<br>5=Govt. Upazila Health Complex<br>6= Govt. Maternal & Child Welfare Centre<br>Government<br>7=Other government Hospital                                                                                                                                                                                                                                                                                           | 14 = Homeopath<br>17=Don't know<br>99 = Others<br>(Specify)_____ |      |                                      |
| 514                                                 | AGH_514  | How many months did you consume Calciam tablet when you were pregnant?                                                                                                                                                                                                                                                                                                                                                      | _ _ _ Months                                                     |      |                                      |
| 515                                                 | AGH_515  | How many tablet of Calciam did you consume in a week when you were pregnant?                                                                                                                                                                                                                                                                                                                                                | _ _ _ Tablet                                                     |      |                                      |
| 516                                                 | AGH_516  | Have any doctor or any other health care provider gave you nutrition related counseling when you were pregant?                                                                                                                                                                                                                                                                                                              | 1=Yes 2=No                                                       |      |                                      |
| 517                                                 | AGH_517  | Advice on what matters ?<br>1 =Take enough food<br>2 =Enough rest<br>3 =Category of nutritional food<br>4 =Rules of iron and Folic acid tabet intake<br>5 =Rules of Calciam tablet intake                                                                                                                                                                                                                                   |                                                                  |      |                                      |
| If stillbirth, need not to ask following questions. |          |                                                                                                                                                                                                                                                                                                                                                                                                                             |                                                                  |      |                                      |
| 518                                                 | AGH_518  | Had your child been measured birth weight within 3 days after birth?                                                                                                                                                                                                                                                                                                                                                        | 1=Yes 2=No<br>88=Not applicable                                  |      | If not applicable go to next section |
| 519                                                 | AGH_519  | What was your child's birth weight?                                                                                                                                                                                                                                                                                                                                                                                         | _ _ . _ _ _  kg                                                  |      |                                      |
| 520                                                 | AGH_520  | Afterwards had any doctor or any health care provider took your child's weight?                                                                                                                                                                                                                                                                                                                                             | 1=Yes 2=No<br>88=Not applicable                                  |      |                                      |
| 521                                                 | AGH_521  | Do you have any charts for your child's weight for age?                                                                                                                                                                                                                                                                                                                                                                     | 1=Yes 2=No                                                       |      |                                      |
| 522                                                 | AGH_522  | After your baby is born, Have any doctor or any other health care provider gave you nutrition related counseling?                                                                                                                                                                                                                                                                                                           | 1=Yes 2=No                                                       |      |                                      |
| 523                                                 | AGH_523  | Advice on what matters ?<br>1 =Take enough food<br>2 =Enough rest<br>3 =Category of nutritional food<br>4 =Rules of iron and Folic acid tabet intake<br>5 =Rules of Calciam tablet intake<br>6=Exclusive breastfeeding at first 6 months<br>7=Continue breastfeeding up to 2 years age<br>8=Rules of supplementary food intake<br>9=The rules for feeding the child at the time of illness<br>10=Do not feed the store food |                                                                  |      |                                      |

#### Section6: Mental Health

| No                                                                     | Variable | Question                                    | Response Options                                                 | Code | Instructions |
|------------------------------------------------------------------------|----------|---------------------------------------------|------------------------------------------------------------------|------|--------------|
| Over the last 2 weeks how often you have faced the following problems? |          |                                             |                                                                  |      |              |
| 601                                                                    | AGM_601  | Less interest or less joy to do something   | 0=Not at all<br>1=Some time<br>2=Most of the time<br>3= All time |      |              |
| 602                                                                    | AGM_602  | Feeling Upset, depressed,irritable,hopeless | 0=Not at all<br>1=Some time<br>2=Most of the time<br>3= All time |      |              |

## Referral

## Section 7: Anthropometry

82



Participant ID:   
National Nutrition Surveillance (NNS)

| No  | Variable         | Question                           |                  | Responses and code categories |                                                                                 | Code | Instructions     |
|-----|------------------|------------------------------------|------------------|-------------------------------|---------------------------------------------------------------------------------|------|------------------|
| 707 | AGA_707A<br>/B/C | Height<br>(Cm)                     | A.          <br> | B.          <br>              | C.          <br>If A and B differs more than<br>0.5 cm, take 3rd<br>measurement |      |                  |
| 708 | AGA_708A<br>/B/C | Weight<br>(kg)                     | A.          <br> | B.          <br>              | C.          <br>If A and B differs more than<br>0.1kg, take 3rd measurement     |      |                  |
| 709 | AGA_709A<br>/B/C | Fat%                               | A.          <br> | B.          <br>              |                                                                                 |      |                  |
| 710 | AGA_710A<br>/B/C | Water%                             | A.          <br> | B.          <br>              |                                                                                 |      |                  |
| 711 | AGA_711A<br>/B/C | Waist<br>circumfer<br>ence<br>(Cm) | A.          <br> | B.          <br>              | C.          <br>If A and B differs more than<br>0.5 cm, take 3rd<br>measurement |      |                  |
| 712 | AGA_712          | Comment                            |                  |                               |                                                                                 |      |                  |
|     |                  |                                    |                  |                               |                                                                                 |      |                  |
|     |                  |                                    |                  |                               |                                                                                 |      |                  |
| 713 | AGA_713          | End Time of<br>measurement         | <br>Hr : Min     |                               |                                                                                 |      | Use 24 hr format |

## Section 1: General Information

82



| No  | Variable | Question                                                                                                                                                                                                                                                                                 | Response Options                                                                                                                                                                                                                                                                                                                                                                                                                                                                                                                                                  | Code | Instructions/Skip |
|-----|----------|------------------------------------------------------------------------------------------------------------------------------------------------------------------------------------------------------------------------------------------------------------------------------------------|-------------------------------------------------------------------------------------------------------------------------------------------------------------------------------------------------------------------------------------------------------------------------------------------------------------------------------------------------------------------------------------------------------------------------------------------------------------------------------------------------------------------------------------------------------------------|------|-------------------|
|     |          | education (Is completed years)<br>[Excluding pre-school and informal education). Write down "00" if no formal education.]                                                                                                                                                                | <ul style="list-style-type: none"> <li>Post graduate/kamil/dawra=18</li> </ul>                                                                                                                                                                                                                                                                                                                                                                                                                                                                                    |      |                   |
| 108 | AM_108   | <p>Mother's occupation of the respondent over the past 12 months</p> <p>If the participant has been employed more than one occupation in the last 12 months, consider the profession that he has spent most of his time as the main occupation and write it down</p>                     | <p>1 = Agricultural work(paddy)<br/>2 = Agricultural work(without paddy)<br/>3 = Agricultural day labor<br/>4 = Un skild day labor<br/>5 = Skiled day labor<br/>6= Driver of Rickshaw/ van/Wheel barrow/Baby taxi/ Boatman<br/>7=Fisherman<br/>8=Employer<br/>9=Profesionals<br/>10=Businessman<br/>11= Petty businessman<br/>12= House maid<br/>13=Zoom fermar<br/>14= Do not earn<br/>15=Poultry/dairy fermar<br/>16=Handicrafts<br/>17 =Spinach vegetable<br/>18=Fishery<br/>19 = Homemaker<br/>20= Student<br/>77 = Don,t know<br/>66 =Age below 06 years</p> |      |                   |
| 109 | AM_109   | <p>Completed years of education of the father of the respondent</p> <p>[Instruction: Write down in total, the years the respondent spent in school for formal education (Is completed years) [Excluding pre-school and informal education). Write down "00" if no formal education.]</p> | <p>[ ] [ ] Years</p> <ul style="list-style-type: none"> <li>Primary/Ebtedayee=5</li> <li>Secondary/Dakhil=10</li> <li>Higher/ Secondary/ Diploma/Alim=12</li> <li>Graduate/Fazil=16</li> <li>Post graduate/kamil/dawra=18</li> </ul>                                                                                                                                                                                                                                                                                                                              |      |                   |
| 110 | AM_110   | <p>Father's occupation of the respondent over the past 12 months</p> <p>If the participant has been employed more than one occupation in the last 12 months, consider the profession that he has spent most of his time as the main occupation and write it down</p>                     | <p>1 = Agricultural work(paddy)<br/>2 = Agricultural work(without paddy)<br/>3 = Agricultural day labor<br/>4 = Un skild day labor<br/>5 = Skiled day labor<br/>6= Driver of Rickshaw/ van/Wheel barrow/Baby taxi/ Boatman<br/>7=Fisherman<br/>8=Employer<br/>9=Profesionals<br/>10=Businessman<br/>11= Petty businessman<br/>12= House maid<br/>13=Zoom fermar<br/>14= Do not earn<br/>15=Poultry/dairy fermar<br/>16=Handicrafts<br/>17 =Spinach vegetable</p>                                                                                                  |      |                   |

## Section 2: Dietary diversity

82

|     | Variable             | Question                     |                                                                                                        | Yesterday during the day or night, did your child consume the following food items? (A) | During the last 07 days how many days did your child consume the following food items (B) | During the last 07 dayshow many times did your child consume the following food items (C) |
|-----|----------------------|------------------------------|--------------------------------------------------------------------------------------------------------|-----------------------------------------------------------------------------------------|-------------------------------------------------------------------------------------------|-------------------------------------------------------------------------------------------|
| 206 | AMD_2<br>06<br>A/B/C | Red/orange/yellow vegetables | Orange sweet potato,pumpkin, carrot or other yellow or orange vegetable                                | 1 = Yes<br>2 = No                                                                       | _ _ <br>  days                                                                            | _ _ <br>  times                                                                           |
| 207 | AMD_2<br>07<br>A/B/C | Red/orange/yellow fruits     | Ripe mangoes, papaya, jackfruits other red/yellow or orange fruit                                      | 1 = Yes<br>2 = No                                                                       | _ _ <br>  days                                                                            | _ _ <br>  times                                                                           |
| 208 | AMD_2<br>08<br>A/B/C | Vitamin C rich fruits        | Guava, Strawberry, Lemon, Orange,grapes, Pineapple,raw mango,amalaki,kueue,tomatos                     | 1 = Yes<br>2 = No                                                                       | _ _ <br>  days                                                                            | _ _ <br>  times                                                                           |
| 209 | AMD_2<br>09<br>A/B/C | Vitamin C rich vegetables    | Raw tomato,chilli pepper, brussels sprouts,cauliflower,cabbage                                         | 1 = Yes<br>2 = No                                                                       | _ _ <br>  days                                                                            | _ _ <br>  times                                                                           |
| 210 | AMD_2<br>10<br>A/B/C | Other vegetables or fruits   | peas, asparagas, bit,koci bash, cauliflower,selari,shawsha,brinjal,letus, masrum,mula,jukini           | 1 = Yes<br>2 = No                                                                       | _ _ <br>  days                                                                            | _ _ <br>  times                                                                           |
| 211 | AMD_2<br>11<br>A/B/C | Other fruits                 | Apple, avakado,bam, cherry,ripe jackfruit                                                              | 1 = Yes<br>2 = No                                                                       | _ _ <br>  days                                                                            | _ _ <br>  times                                                                           |
| 212 | AMD_2<br>12<br>A/B/C | Eggs                         | Hen/duck, other birds,                                                                                 | 1 = Yes<br>2 = No                                                                       | _ _ <br>  days                                                                            | _ _ <br>  times                                                                           |
| 213 | AMD_2<br>13<br>A/B/C | Organ meat                   | Cheeks, liver, Stomach, Ridpind, Kidney                                                                | 1 = Yes<br>2 = No                                                                       | _ _ <br>  days                                                                            | _ _ <br>  times                                                                           |
| 214 | AMD_2<br>14<br>A/B/C | Flesh                        | Beef, Pork, Veal, Lamb, Goat, Chicken, Duck or flesh of any other animal                               | 1 = Yes<br>2 = No                                                                       | _ _ <br>  days                                                                            | _ _ <br>  times                                                                           |
| 215 | AMD_2<br>15<br>A/B/C | Small Fish                   | Small Fish Eaten Whole with Bones (i.e.Kachki, mola, dhela, chapila, batashi, small prawn, dried fish) | 1 = Yes<br>2 = No                                                                       | _ _ <br>  days                                                                            | _ _ <br>  times                                                                           |
| 216 | AMD_2<br>16<br>A/B/C | Large fish/sea food          | Large Whole Fish and Shell Fish and dried fish                                                         | 1 = Yes<br>2 = No                                                                       | _ _ <br>  days                                                                            | _ _ <br>  times                                                                           |
| 217 | AMD_2<br>17<br>A/B/C | Dairy                        | Milk, cheese, yogurt or other milk products                                                            | 1 = Yes<br>2 = No                                                                       | _ _ <br>  days                                                                            | _ _ <br>  times                                                                           |
| 218 | AMD_2                | Insects and other            | Fish egg, insect, snail                                                                                | 1 = Yes                                                                                 | _ _                                                                                       | _ _                                                                                       |

The next questions I will ask about the **fruits** and **vegetables** that you usually eat; I have a nutrition card/picture here that shows you some examples of local fruits and vegetables; Each picture represents the size of a serving; To answer these questions, please think of a typical week. (If 1-2 times/month then record it as "00.")



## National Nutrition Surveillance (NNS)

Section 3: Behavioral risk factor (Smoking/smokeless tobacco physical activity)Page 52 of 82



## National Nutrition Surveillance (NNS)

|     |         |                                                                                                                                                                                                                                                                                                                                                                                                                                                                                                                                                                                                                                                                                                                                                                                                                 |                                                  |  |  |
|-----|---------|-----------------------------------------------------------------------------------------------------------------------------------------------------------------------------------------------------------------------------------------------------------------------------------------------------------------------------------------------------------------------------------------------------------------------------------------------------------------------------------------------------------------------------------------------------------------------------------------------------------------------------------------------------------------------------------------------------------------------------------------------------------------------------------------------------------------|--------------------------------------------------|--|--|
| 301 | AMR_301 | <p>Do you <u>currently</u> smoke any tobacco products, such as cigarettes, <i>bidis</i>, <i>hookah</i>, <i>cigars</i> or pipes?</p> <p><i>Instruction: Demonstrate show card to the participant and ask which smoke tobacco products/he use. [USE SHOWCARD]</i></p>                                                                                                                                                                                                                                                                                                                                                                                                                                                                                                                                             | <p>1 = Yes; 2= No<br/>If No, go to ABR_304</p>   |  |  |
| 302 | AMR_302 | <p>Do you <u>currently</u> smoke tobacco products <u>daily</u>?</p> <p><i>Instruction: This question is applicable for those respondents who smoke tobacco product daily.<br/>Daily means" tobacco smoking is at least one time/day for almost one month or more than that<br/>If that is the case respondent started somoking from 25 days and still running, that is regarded as everyday.</i></p>                                                                                                                                                                                                                                                                                                                                                                                                            | <p>1 = Yes; 2= No</p>                            |  |  |
| 303 | AMR_303 | <p>How old were you when you <b>first started</b> smoking?</p>                                                                                                                                                                                                                                                                                                                                                                                                                                                                                                                                                                                                                                                                                                                                                  | <p>Age <u>    </u> years<br/>77 = Don't know</p> |  |  |
| 304 | AMR_304 | <p>Do you currently use any smokeless tobacco products such as Betel quid with zarda, zarda only or zarda with supari, Betel quid with sadapata, pan masala with tobacco, sadapata chewing, gul, Khoinee, Nossi, gutka?</p> <p><b>Instruction:</b> Ask respondent to think and answer whether h/she use any smokeless tobacco products such as Betel quid with zarda, zarda only or zarda with supari, Betel quid with sadapata, pan masala with tobacco, sadapata chewing, gul, Khoinee, Nossi, gutka. Here, only betel quid, supari and lime will not be considered. It will be considered as smokeless tobacco if respondent use Betel quid with zarda, zarda only or zarda with supari, Betel quid with sadapata, pan masala with tobacco, sadapata chewing, gul, Khoinee, Nossi, gutka. [USE SHOWCARD]</p> | <p>1 = Yes; 2= No<br/>If No, go to ABR_307</p>   |  |  |
| 305 | AMR_305 | <p>Do you <u>currently</u> use <u>smokeless tobacco</u> <u>daily</u>?</p> <p><b>Instruction:</b> Daily means "using smokeless tobacco is at least one time/day for almost one month or more than that.<br/>If that is the case respondent started somoking from 25 days and still running, that is regarded as everyday.</p>                                                                                                                                                                                                                                                                                                                                                                                                                                                                                    | <p>1 = Yes; 2= No</p>                            |  |  |
| 306 | AMR_306 | <p>How old were you when you started smokeless tobacco?</p>                                                                                                                                                                                                                                                                                                                                                                                                                                                                                                                                                                                                                                                                                                                                                     | <p>Age <u>    </u> years<br/>77 = Don't know</p> |  |  |



| No                                                                                                                                                                                                                                                                                                                                                                                                                                                                                                                                                                                                                                                                                                                                                                                                                                                                                                                                                                                                                                                                                                                                                                                                                                                                                                                                                                                                                                                                                                                                                                                                                                                                                                                                                                                                                                                                                                                                                           | Variable | Question                                                                                                                                                                                                                                                                                                                                                                                                                                                                                                                                                                                                                                                                                                                       | Response Options                                                                                                                            | Code | Instructions/ Skip |
|--------------------------------------------------------------------------------------------------------------------------------------------------------------------------------------------------------------------------------------------------------------------------------------------------------------------------------------------------------------------------------------------------------------------------------------------------------------------------------------------------------------------------------------------------------------------------------------------------------------------------------------------------------------------------------------------------------------------------------------------------------------------------------------------------------------------------------------------------------------------------------------------------------------------------------------------------------------------------------------------------------------------------------------------------------------------------------------------------------------------------------------------------------------------------------------------------------------------------------------------------------------------------------------------------------------------------------------------------------------------------------------------------------------------------------------------------------------------------------------------------------------------------------------------------------------------------------------------------------------------------------------------------------------------------------------------------------------------------------------------------------------------------------------------------------------------------------------------------------------------------------------------------------------------------------------------------------------|----------|--------------------------------------------------------------------------------------------------------------------------------------------------------------------------------------------------------------------------------------------------------------------------------------------------------------------------------------------------------------------------------------------------------------------------------------------------------------------------------------------------------------------------------------------------------------------------------------------------------------------------------------------------------------------------------------------------------------------------------|---------------------------------------------------------------------------------------------------------------------------------------------|------|--------------------|
| 307                                                                                                                                                                                                                                                                                                                                                                                                                                                                                                                                                                                                                                                                                                                                                                                                                                                                                                                                                                                                                                                                                                                                                                                                                                                                                                                                                                                                                                                                                                                                                                                                                                                                                                                                                                                                                                                                                                                                                          | AMR_307  | Which of your parents or guardians use any form of tobacco?                                                                                                                                                                                                                                                                                                                                                                                                                                                                                                                                                                                                                                                                    | 1= Neither<br>2= My father or male guardian<br>3= My mother or female guardian<br>4= Both<br>5= I do not know<br>99= Others (Specify) _____ |      |                    |
| <b>Physical activity</b>                                                                                                                                                                                                                                                                                                                                                                                                                                                                                                                                                                                                                                                                                                                                                                                                                                                                                                                                                                                                                                                                                                                                                                                                                                                                                                                                                                                                                                                                                                                                                                                                                                                                                                                                                                                                                                                                                                                                     |          |                                                                                                                                                                                                                                                                                                                                                                                                                                                                                                                                                                                                                                                                                                                                |                                                                                                                                             |      |                    |
| <p>Next I am going to ask you about the time you spend doing different types of physical activity in a typical week. Please answer these questions even if you do not consider yourself to be a physically active person.</p> <p>Think first about the time you spend doing work. Think of work as the things that you have to do such as paid or unpaid work, study/training, household chores, harvesting food/crops, fishing or hunting for food, seeking employment. [Insert other examples if needed]. In answering the following questions 'vigorous-intensity activities' are activities that require hard physical effort and cause large increases in breathing or heart rate, 'moderate-intensity activities' are activities that require moderate physical effort and cause small increases in breathing or heart rate.</p> <p><b>Instruction:</b> Please read out the above statement for respondent. Do not drop this part. At first respondent will must think about his/her daily activities (Paid or unpaid work, study/training, household chores, harvesting food/crops, fishing or hunting for food, seeking employment). Then will think time for travelling from one place to another and at last time spent during leisure period.</p> <p>Do not forget to demonstrate show card to the respondent which will help them to respond.</p> <p>It is needed to let participant remember when answer the following things</p> <p><b>Vigorous intensity activity:</b> Such kind of physical activity that causes <u>large increases</u> in breathing or heart rate.</p> <p><b>Moderate-intensity activity:</b> Such kind of physical activity that causes <u>small increases</u> in breathing or heart rate.</p> <p>Now I would like to know about the 'Vigorous-intensity activities' you perform</p> <p>'Vigorous-intensity activities' performed as a part of daily work / professional work/ outside daily work / professional work.</p> |          |                                                                                                                                                                                                                                                                                                                                                                                                                                                                                                                                                                                                                                                                                                                                |                                                                                                                                             |      |                    |
| 308                                                                                                                                                                                                                                                                                                                                                                                                                                                                                                                                                                                                                                                                                                                                                                                                                                                                                                                                                                                                                                                                                                                                                                                                                                                                                                                                                                                                                                                                                                                                                                                                                                                                                                                                                                                                                                                                                                                                                          | AMR_308  | Does your daily work / professional work, sports, fitness or recreational(leisure) activities involve <u>vigorous-intensity activity</u> that causes large increases in breathing or heart rate like [carrying or lifting heavy loads, digging or construction work, harvesting paddy, fishing using net, running, football, Kabaddi, Dariabandha, Gollachut etc.] <u>for at least 10 minutes continuously?</u><br><b>Instruction:</b> Ask participant to think about those <u>vigorous-intensity activities performed as a part of professional work/ recreational activities. Those activities will be considered as vigorous-intensity activities that causes large increase in breathing or heart rate. [USE SHOWCARD]</u> | 1 = Yes    2 = No<br>[If 'No', please go to 311]                                                                                            |      |                    |
| 309                                                                                                                                                                                                                                                                                                                                                                                                                                                                                                                                                                                                                                                                                                                                                                                                                                                                                                                                                                                                                                                                                                                                                                                                                                                                                                                                                                                                                                                                                                                                                                                                                                                                                                                                                                                                                                                                                                                                                          | AMR_309  | In a typical week, on how many days do you do <u>vigorous- intensity activities/sports/fitness as part of daily work / professional work/ recreational activities?</u><br><b>Instruction:</b> In a typical week refers to "activities performed by respondent in a typical week". Valid response range is 1-7 days.                                                                                                                                                                                                                                                                                                                                                                                                            | ____ Day<br>77 = Don't know<br>[If 'Don't know', please go to ABR_311]                                                                      |      |                    |
| 310                                                                                                                                                                                                                                                                                                                                                                                                                                                                                                                                                                                                                                                                                                                                                                                                                                                                                                                                                                                                                                                                                                                                                                                                                                                                                                                                                                                                                                                                                                                                                                                                                                                                                                                                                                                                                                                                                                                                                          | AMR_310  | <u>How much time</u> do you spend doing <u>vigorous-intensity activities/sports/fitness at daily work / professional work/recreational activities</u> on a typical day?<br><b>Instruction:</b> Ask respondent to think about a single day (which can be remembered easily) s/he performed vigorous-intensity activities as part of professional work/ recreational activities. Respondent will consider only those activities that are performed for at least 10 minutes or more continuously. Check unusual (more than 04 hours) values.                                                                                                                                                                                      | _____<br>Minutes                                                                                                                            |      |                    |



| Now I would like to know about the 'Moderate-intensity activity' you perform                                                                                                                                                                                                                                                    |         |                                                                                                                                                                                                                                                                                                                                                                                                                                                                                                                                                                                                             |                                                                        |  |  |
|---------------------------------------------------------------------------------------------------------------------------------------------------------------------------------------------------------------------------------------------------------------------------------------------------------------------------------|---------|-------------------------------------------------------------------------------------------------------------------------------------------------------------------------------------------------------------------------------------------------------------------------------------------------------------------------------------------------------------------------------------------------------------------------------------------------------------------------------------------------------------------------------------------------------------------------------------------------------------|------------------------------------------------------------------------|--|--|
| 'Moderate-intensity activity' performed as a part of daily work / professional work                                                                                                                                                                                                                                             |         |                                                                                                                                                                                                                                                                                                                                                                                                                                                                                                                                                                                                             |                                                                        |  |  |
| 311                                                                                                                                                                                                                                                                                                                             | AMR_311 | Does your daily work / professional work/ spots/fitness/ recreational (leisure) work involve moderate-intensity activity that causes small increases in breathing or heart rate such as brisk walking [or carrying light loads, cycling, swimming, volleyball] for at least 10 minutes continuously?<br><i>Instruction: Ask participant to think about those moderate-intensity activities performed as a part of professional work/ recreational activities. Those activities will be considered as moderate-intensity activities that causes small increase in breathing or heart rate. [USESHOWCARD]</i> | 1 = Yes    2 = No<br>[If 'No', please go to ABR_314]                   |  |  |
| 312                                                                                                                                                                                                                                                                                                                             | AMR_312 | In a typical week, on how many days do you do moderate- intensity activities as part of your daily work / professional work/sports/fitness or recreational work?<br><i>Instruction: In a typical week refers to "activities done by respondent in a typical week". Valid response range is 1-7 days.</i>                                                                                                                                                                                                                                                                                                    | ____ Day<br>77 = Don't know<br>[If 'Don't know', please go to ABR_314] |  |  |
| 313                                                                                                                                                                                                                                                                                                                             | AMR_313 | How much time do you spend doing moderate-intensity activities at daily work / professional work/ sports/fitness or recreational work on a typical day?<br><i>Instruction: Ask respondent to think about a single day (which can be remembered easily) s/he performed moderate-intensity activities as part of professional work/recreational activities. Respondent will consider only those activities that are performed for at least 10 minutes or more continuously. Check unusual (more than 04 hours) values.</i>                                                                                    | _____<br>Minutes                                                       |  |  |
| <b>Sedentary behavior</b> The following question is about sitting or reclining at work, at home, getting to and from places, or with friends including time spent sitting at a desk, sitting with friends, traveling in car, bus, train, reading, playing cards or watching television, but do not include time spent sleeping. |         |                                                                                                                                                                                                                                                                                                                                                                                                                                                                                                                                                                                                             |                                                                        |  |  |
| 314                                                                                                                                                                                                                                                                                                                             | AMR_314 | How much time do you usually spend sitting or reclining on a typical day?<br><i>Instruction: Ask respondent to think about time spent on sitting or reclining at work, office, study, watching television, computer use, at kitchen, during rest. Do not include time spent during sleeping.</i>                                                                                                                                                                                                                                                                                                            | _____<br>Minutes                                                       |  |  |
| 315                                                                                                                                                                                                                                                                                                                             | AMR_315 | How much time do you watch television daily?                                                                                                                                                                                                                                                                                                                                                                                                                                                                                                                                                                | _____<br>Minutes                                                       |  |  |

#### Section 4: Chronic Disease

| No  | Variable | Question                                                                                                                           | Response Options | Code | Instructions/ Skip |
|-----|----------|------------------------------------------------------------------------------------------------------------------------------------|------------------|------|--------------------|
| 401 | MCD_401  | Has a health care provider ever told you that you have high blood pressure also called hypertension (other than during pregnancy)? | 1 = Yes 2 = No   |      |                    |
| 402 | MCD_402  | Has a health care provider ever told you that you have heart disease?                                                              | 1 = Yes 2 = No   |      |                    |
| 403 | MCD_403  | Has a health care provider ever told you that you have asthma/bronchitis?                                                          | 1 = Yes 2 = No   |      |                    |

## Section 5: Blood Pressure

**Referral:**

## Section 6: Anthropometry

82



## National Nutrition Surveillance (NNS)

| No  | Variable         | Measurement                        | Measurement 1 | Measurement 2 | Measurement 3                                                                         |
|-----|------------------|------------------------------------|---------------|---------------|---------------------------------------------------------------------------------------|
| 607 | AMA_607A<br>/B/C | Height<br>(Cm)                     | A.            | B.            | C.                <br>If A and B differs more than<br>0.5 cm, take 3rd<br>measurement |
| 608 | AMA_608A<br>/B/C | Weight<br>(kg)                     | A.            | B.            | C.                <br>If A and B differs more than<br>0.1kg, take 3rd measurement     |
| 609 | AMA_609A<br>/B/C | Fat%                               | A.            | B.            |                                                                                       |
| 610 | AMA_610A<br>/B/C | Water%                             | A.            | B.            |                                                                                       |
| 611 | AMA_611A<br>/B/C | Waist<br>circumfer<br>ence<br>(Cm) | A.            | B.            | C.                <br>If A and B differs more than<br>0.5 cm, take 3rd<br>measurement |
| 612 | AMA_612          | Comment                            |               |               |                                                                                       |
| 613 | AMA_613          | End Time of<br>measurement         |               | <br>Hr : Min  | Use 24 hr format                                                                      |

## Section 1: General Information

| No  | Variable | Question                                                                                                                               | Response Options                                                                                                                                       | Code | Instructions/<br>Skip |
|-----|----------|----------------------------------------------------------------------------------------------------------------------------------------|--------------------------------------------------------------------------------------------------------------------------------------------------------|------|-----------------------|
| 101 | AW_101   | What's your name?(with<br>nick name)                                                                                                   | _____                                                                                                                                                  |      |                       |
| 102 | AW_102   | What's your date of birth                                                                                                              | <div> <div></div> <div></div> <div>/</div> <div></div> <div></div> <div>/</div> <div>20</div> <div></div> <div></div> </div> <div>DD / MM / YYYY</div> |      |                       |
| 103 | AW_103   | Age of the respondent<br>(Write complete year)                                                                                         | _ _  year                                                                                                                                              |      |                       |
| 104 | AW_104   | What is your marital<br>status?                                                                                                        | 1 = Never married<br>2 = Currently married<br>3 = Separated<br>4 = Divorced<br>5 = Widowed<br>88 = Refused                                             |      |                       |
| 105 | AW_105   | Completed years of education<br>the respondent completed<br><br><b>[Instruction: Write down in<br/>total, the years the respondent</b> | <div> _ _  Years</div> <ul style="list-style-type: none"> <li>• Primary/Ebte dayee=5</li> <li>• Secondary/Dakhil=10</li> </ul>                         |      |                       |



| No  | Variable | Question                                                                                                                                                                                                                                                                                        | Response Options                                                                                                                                                                                                                                                                                                                                                                                                                                                                                                                                                                                                                 | Code | Instructions/Skip |
|-----|----------|-------------------------------------------------------------------------------------------------------------------------------------------------------------------------------------------------------------------------------------------------------------------------------------------------|----------------------------------------------------------------------------------------------------------------------------------------------------------------------------------------------------------------------------------------------------------------------------------------------------------------------------------------------------------------------------------------------------------------------------------------------------------------------------------------------------------------------------------------------------------------------------------------------------------------------------------|------|-------------------|
|     |          | spent in school for formal education (Is completed years) [Excluding pre-school and informal education). Write down "00" if no formal education.]                                                                                                                                               | <ul style="list-style-type: none"> <li>Higher secondary/ Diploma/Alim=12</li> <li>Graduate/Fazil=16</li> <li>Post graduate/kamil/dawra=18</li> </ul>                                                                                                                                                                                                                                                                                                                                                                                                                                                                             |      |                   |
| 106 | AW_106   | <p>Occupation of the respondent over the past 12 months</p> <p>If the participant has been employed more than one occupation in the last 12 months, consider the profession that he has spent most of his time as the main occupation and write it down</p>                                     | <p>1 = Agricultural work(paddy)</p> <p>2 = Agricultural work(without paddy)</p> <p>3 = Agricultural day labor</p> <p>4 = Un skild day labor</p> <p>5 = Skiled day labor</p> <p>6= Driver of Rickshaw/ van/Wheel barrow/Baby taxi/ Boatman</p> <p>7=Fisherman</p> <p>8=Employer</p> <p>9=Profesionals</p> <p>10=Businessman</p> <p>11= Petty businessman</p> <p>12= House maid</p> <p>13=Zoom fermar</p> <p>14= Do not earn</p> <p>15=Poultry/dairy fermar</p> <p>16=Handicrafts</p> <p>17 =Spinach vegetable</p> <p>18=Fishery</p> <p>19 = Homemaker</p> <p>20= Student</p> <p>77 = Don,t know</p> <p>66 =Age below 06 years</p> |      |                   |
| 107 | AW_107   | <p>Completed years of education of the mother of the respondent</p> <p><b>[Instruction: Write down in total, the years the respondent spent in school for formal education (Is completed years) [Excluding pre-school and informal education). Write down "00" if no formal education.]</b></p> | <p>____ Years</p> <ul style="list-style-type: none"> <li>Primary/Ebtedayee=5</li> <li>Secondary/Dakhil=10</li> <li>Higher Secondary/Diploma/Alim=12</li> <li>Graduate/Fazil=16</li> <li>Post graduate/kamil/dawra=18</li> </ul>                                                                                                                                                                                                                                                                                                                                                                                                  |      |                   |
| 108 | AW_108   | <p>Mother's occupation of the respondent over the past 12 months</p> <p>If the participant has been employed more than one occupation in the last 12 months, consider the profession that he has spent most of his time as the main occupation and write it down</p>                            | <p>1 = Agricultural work(paddy)</p> <p>2 = Agricultural work(without paddy)</p> <p>3 = Agricultural day labor</p> <p>4 = Un skild day labor</p> <p>5 = Skiled day labor</p> <p>6= Driver of Rickshaw/ van/Wheel barrow/Baby taxi/ Boatman</p> <p>7=Fisherman</p> <p>8=Employer</p> <p>9=Profesionals</p> <p>10=Businessman</p> <p>11= Petty businessman</p> <p>12= House maid</p> <p>13=Zoom fermar</p> <p>14= Do not earn</p>                                                                                                                                                                                                   |      |                   |

## Section 2: Dietary diversity

82

|     |                      | Food Category                                | Examples of foods                                                                                                 | A                 | B                                                           | C                                                            |
|-----|----------------------|----------------------------------------------|-------------------------------------------------------------------------------------------------------------------|-------------------|-------------------------------------------------------------|--------------------------------------------------------------|
| 201 | AWD_2<br>01<br>A/B/C | Starchy Staples/<br>Food made from<br>grains | Rice, flour bread, wheat, muri,<br>maize, kichuri, barli, oot, kinoya, noodles, pasta                             | 1 = Yes<br>2 = No | <input type="checkbox"/> <input type="checkbox"/><br>  days | <input type="checkbox"/> <input type="checkbox"/><br>  times |
| 202 | AWD_2<br>02<br>A/B/C | White roots and<br>tubers and plantains      | potatoes, sweet potatoes, sagu,<br>erarut, cave, shalgam, kuchu, wiggler, ripe<br>banana shaloo                   | 1 = Yes<br>2 = No | <input type="checkbox"/> <input type="checkbox"/><br>  days | <input type="checkbox"/> <input type="checkbox"/><br>  times |
| 203 | AWD_2<br>03<br>A/B/C | Pulses                                       | Dal/khichuri, peas, moor, soybean, tofu<br>peanuts, humas                                                         | 1 = Yes<br>2 = No | <input type="checkbox"/> <input type="checkbox"/><br>  days | <input type="checkbox"/> <input type="checkbox"/><br>  times |
| 204 | AWD_2<br>04<br>A/B/C | Legumes and Nuts                             | Peanut, Pistachios, kaju or any kind<br>of peanut, ciya seeds, til, tisi, sunflower<br>seeds, sweet pumpkin seeds | 1 = Yes<br>2 = No | <input type="checkbox"/> <input type="checkbox"/><br>  days | <input type="checkbox"/> <input type="checkbox"/><br>  times |
| 205 | AWD_2<br>05<br>A/B/C | Dark green leafy<br>vegetables               | All kinds of leafy vegetables<br>(poo, kuchu, kalmi) Brooklyn                                                     | 1 = Yes<br>2 = No | <input type="checkbox"/> <input type="checkbox"/><br>  days | <input type="checkbox"/> <input type="checkbox"/><br>  times |
| 206 | AWD_2<br>06<br>A/B/C | Red/orange/yellow<br>vegetables              | Orange sweet potato, pumpkin, carrot<br>or other yellow or orange vegetable                                       | 1 = Yes<br>2 = No | <input type="checkbox"/> <input type="checkbox"/><br>  days | <input type="checkbox"/> <input type="checkbox"/><br>  times |
| 207 | AWD_2<br>07<br>A/B/C | Red/orange/yellow<br>fruits                  | Ripe mangoes, papaya, jackfruits other<br>red/yellow or orange fruit                                              | 1 = Yes<br>2 = No | <input type="checkbox"/> <input type="checkbox"/><br>  days | <input type="checkbox"/> <input type="checkbox"/><br>  times |
| 208 | AWD_2<br>08<br>A/B/C | Vitamin C rich fruits                        | Guava, Strawberry, Lemon,<br>Orange, grapes, Pineapple, raw<br>mango, amalaki, kueue, tomatoes                    | 1 = Yes<br>2 = No | <input type="checkbox"/> <input type="checkbox"/><br>  days | <input type="checkbox"/> <input type="checkbox"/><br>  times |

Page 61 of 82

82



## National Nutrition Surveillance (NNS)

Section 3: Behavioral risk factor (Smoking/smokeless tobacco physical activity)Version 1.0/ 31 April 2019



## Physical activity



Think first about the time you spend doing work. Think of work as the things that you have to do such as paid or unpaid work, study/training, household chores, harvesting food/crops, fishing or hunting for food, seeking employment. [Insert other examples if needed]. In answering the following questions 'vigorous-intensity activities' are activities that require hard physical effort and cause large increases in breathing or heart rate, 'moderate-intensity activities' are activities that require moderate physical effort and cause small increases in breathing or heart rate.

*Do not forget to demonstrate show card to the respondent which will help them to respond.*

**Vigorous intensity activity:** Such kind of physical activity that causes large increases in breathing or heart rate.

Now I would like to know about the 'Vigorous-intensity activities' you perform

'Vigorous-intensity activities' performed as a part of daily work / professional work/ outside daily work / professional work.

|     |         |                                                                                                                                                                                                                                                                                                                                                                                                                                                                                                                                                                                                                                                                                                                         |                                                                                 |  |  |
|-----|---------|-------------------------------------------------------------------------------------------------------------------------------------------------------------------------------------------------------------------------------------------------------------------------------------------------------------------------------------------------------------------------------------------------------------------------------------------------------------------------------------------------------------------------------------------------------------------------------------------------------------------------------------------------------------------------------------------------------------------------|---------------------------------------------------------------------------------|--|--|
| 308 | AWR_308 | Does your daily work / professional work, sports, fitness or recreational(leisure) activities involve <u>vigorous-intensity activity</u> that causes large increases in breathing or heart rate like [carrying or lifting heavy loads, digging or construction work, harvesting paddy, fishing using net, running, football, Kabaddi, Dariabandha, Gollachut etc.] <u>for at least 10 minutes continuously?</u><br><b>Instruction:</b> Ask participant to think about those vigorous-intensity activities performed as a part of professional work/ recreational activities. Those activities will be considered as vigorous-intensity activities that causes large increase in breathing or heart rate. [USE SHOWCARD] | 1 = Yes      2 = No<br>[If 'No', please go to 311]                              |  |  |
| 309 | AWR_309 | In a typical week, on how many days do you do <u>vigorous- intensity activities/sports/fitness</u> as part of <u>daily work / professional work/ recreational activities?</u><br><b>Instruction:</b> In a typical week refers to "activities performed by respondent in a typical week". Valid response range is 1-7 days.                                                                                                                                                                                                                                                                                                                                                                                              | <u>      </u> Day<br>77 = Don't know<br>[If 'Don't know', please go to ABR_311] |  |  |
| 310 | AWR_310 | How much time do you spend doing <u>vigorous-intensity activities/sports/fitness</u> at daily work / professional work/recreational activities on a typical day?<br><b>Instruction:</b> Ask respondent to think about a single day (which can be remembered easily) s/he performed vigorous-intensity activities as part of professional work/ recreational activities. Respondent will consider only those activities that are performed for at least 10 minutes or more continuously. Check unusual (more than 04 hours) values.                                                                                                                                                                                      | <u>                        </u><br>Minutes                                      |  |  |

'Moderate-intensity activity' performed as a part of daily work / professional work



|                                                                                                                                                                                                                                                                                                                                 |         |                                                                                                                                                                                                                                                                                                                                                                                                                                                                                                                                                                                                                                  |                                                                               |  |  |
|---------------------------------------------------------------------------------------------------------------------------------------------------------------------------------------------------------------------------------------------------------------------------------------------------------------------------------|---------|----------------------------------------------------------------------------------------------------------------------------------------------------------------------------------------------------------------------------------------------------------------------------------------------------------------------------------------------------------------------------------------------------------------------------------------------------------------------------------------------------------------------------------------------------------------------------------------------------------------------------------|-------------------------------------------------------------------------------|--|--|
| 311                                                                                                                                                                                                                                                                                                                             | AWR_311 | Does your <u>daily work / professional work/ spots/fitness/ recreational (leisure) work</u> involve <u>moderate-intensity activity</u> that causes small increases in breathing or heart rate such as brisk walking [or carrying light loads, cycling, swimming, volleyball] for at least 10 minutes continuously?<br><i><b>Instruction:</b> Ask participant to think about those moderate-intensity activities performed as a part of professional work/ recreational activities. Those activities will be considered as moderate-intensity activities that causes small increase in breathing or heart rate. [USESHOWCARD]</i> | 1 = Yes    2 = No<br>[If 'No', please go to ABR_314]                          |  |  |
| 312                                                                                                                                                                                                                                                                                                                             | AWR_312 | In a typical week, on how many days do you do <u>moderate- intensity activities</u> as part of your <u>daily work / professional work/sports/fitness or recreational work</u> ?<br><i><b>Instruction:</b> In a typical week refers to "activities done by respondent in a typical week". Valid response range is 1-7 days.</i>                                                                                                                                                                                                                                                                                                   | <u>    </u> Day<br>77 = Don't know<br>[If 'Don't know', please go to ABR_314] |  |  |
| 313                                                                                                                                                                                                                                                                                                                             | AWR_313 | How much time do you spend doing <u>moderate-intensity activities</u> at <u>daily work / professional work/ sports/fitness or recreational work</u> on a typical day?<br><i><b>Instruction:</b> Ask respondent to think about a single day (which can be remembered easily) s/he performed moderate-intensity activities as part of professional work/recreational activities. Respondent will consider only those activities that are performed for at least 10 minutes or more continuously. Check unusual (more than 04 hours) values.</i>                                                                                    | <u>                    </u><br>Minutes                                        |  |  |
| <b>Sedentary behavior</b> The following question is about sitting or reclining at work, at home, getting to and from places, or with friends including time spent sitting at a desk, sitting with friends, traveling in car, bus, train, reading, playing cards or watching television, but do not include time spent sleeping. |         |                                                                                                                                                                                                                                                                                                                                                                                                                                                                                                                                                                                                                                  |                                                                               |  |  |
| 314                                                                                                                                                                                                                                                                                                                             | AWR_314 | How much time do you usually spend sitting or reclining on a typical day?<br><i><b>Instruction:</b> Ask respondent to think about time spent on sitting or reclining at work, office, study, watching television, computer use, at kitchen, during rest. Do not include time spent during sleeping.</i>                                                                                                                                                                                                                                                                                                                          | <u>                    </u><br>Minutes                                        |  |  |
| 315                                                                                                                                                                                                                                                                                                                             | AWR_315 | How much time do you watch television daily?                                                                                                                                                                                                                                                                                                                                                                                                                                                                                                                                                                                     | <u>                    </u><br>Minutes                                        |  |  |

#### Section 4: Chronic Disease

| No  | Variable | Question                                                                                                                           | Response Options  | Code | Instructions/ Skip |
|-----|----------|------------------------------------------------------------------------------------------------------------------------------------|-------------------|------|--------------------|
| 401 | WCD_401  | Has a health care provider ever told you that you have high blood pressure also called hypertension (other than during pregnancy)? | 1 = Yes<br>2 = No |      |                    |
| 402 | WCD_402  | Has a health care provider ever told you that you have heart disease?                                                              | 1 = Yes<br>2 = No |      |                    |
| 403 | WCD_403  | Has a health care provider ever told you that you have asthma?                                                                     | 1 = Yes<br>2 = No |      |                    |
| 404 | WCD_404  | Has a health care provider ever told you that you have Kidney Disease?                                                             | 1 = Yes<br>2 = No |      |                    |

| No  | Variable | Question                                                               | Response Options  | Code | Instructions/Skip |
|-----|----------|------------------------------------------------------------------------|-------------------|------|-------------------|
| 405 | WCD_405  | Has a health care provider ever told you that you have Diabetes?       | 1 = Yes<br>2 = No |      |                   |
| 406 | WCD_406  | Has a health care provider ever told you that you have stroke?         | 1 = Yes<br>2 = No |      |                   |
| 407 | WCD_407  | Has a health care provider ever told you that you have cancer?         | 1 = Yes<br>2 = No |      |                   |
| 408 | WCD_408  | Has a health care provider ever told you that you have mental problem? | 1 = Yes<br>2 = No |      |                   |

## Section 5: Reproductive history, menstruation/Menopause, menstrual hygiene

I would like to ask some questions regarding your reproductive history, menstruation, menopause and menopausal hygiene. This information is collecting for the surveillance purpose and I am ensuring you the confidentiality of your information. Can I ask?

| No  | Variable | Question                                                                                                  | Response Options                                                                                         | Code | Instructions/<br>Skip         |
|-----|----------|-----------------------------------------------------------------------------------------------------------|----------------------------------------------------------------------------------------------------------|------|-------------------------------|
| 501 | AWM_501  | When your menarche started?                                                                               | _ _ _ Years                                                                                              |      | Write "00" if not started yet |
| 502 | AWM_502  | What material do you use during period/menstruation?                                                      | 1= Sanitary pad<br>2= Old cloth<br>3= New Cloth<br>99= Others (Specify)____                              |      |                               |
| 503 | AWM_503  | How many times you became pregnant in your life?<br>(Including abortion, MR, still birth and live birth)? | _ _ _ Number                                                                                             |      | If "0" go to 505              |
| 504 | AWM_504  | How many times you delivered live birth in your life                                                      | _ _ _ Number                                                                                             |      |                               |
| 505 | AWM_505  | Are you currently in menstruation?                                                                        | 1= Yes      2=No                                                                                         |      | If "Yes" go to 507            |
| 506 | AWM_506  | What is the reason for your not being menstruation?                                                       | 1 = I am pregnant<br>2 = I may become pregnant<br>3 = <b>menopause</b><br>99= others (specify below)____ |      |                               |
| 507 | AWM_507  | What is your Last date of menstruation (LMP)                                                              | _ _ _ / _ _ _ /20 _ <br> _ _ <br>DD / MM / YY                                                            |      |                               |
| 508 | AWM_508  | Year of menopause                                                                                         | _ _ _ Years                                                                                              |      |                               |

## Section 6 : Health Care

| No  | Variable | Question                                                             | Response Options                           | Code | Instructions            |
|-----|----------|----------------------------------------------------------------------|--------------------------------------------|------|-------------------------|
| 601 | AWH_601  | Did You deliver any live birth or stillbirth in the last 24 months ? | 1=Yes 2=No                                 |      | If "No" go to section 6 |
| 602 | AWH_602  | Date of delivery of live birth or still birth.                       | _ _ _ / _ _ _ /20 _ _ _ <br>Day/Month/Year |      |                         |
| 603 | AWH_603  | Does your child is living now ?                                      | 1=Yes 2=No<br>88=Not applicable            |      |                         |
| 604 | AWH_604  | Have you been registered as a pregnant                               | 1=Yes 2=No                                 |      |                         |



| No  | Variable | Question                                                                                              | Response Options                                                                                                                                                                                                                                                                                                                                                                                                                                                                                                                                                                                                          | Code | Instructions      |
|-----|----------|-------------------------------------------------------------------------------------------------------|---------------------------------------------------------------------------------------------------------------------------------------------------------------------------------------------------------------------------------------------------------------------------------------------------------------------------------------------------------------------------------------------------------------------------------------------------------------------------------------------------------------------------------------------------------------------------------------------------------------------------|------|-------------------|
|     |          | woman when you were pregnant?                                                                         |                                                                                                                                                                                                                                                                                                                                                                                                                                                                                                                                                                                                                           |      |                   |
| 605 | AWH_605  | How many times you took ante natal care (ANC) when you were pregnant?                                 | _ _ Times                                                                                                                                                                                                                                                                                                                                                                                                                                                                                                                                                                                                                 |      |                   |
| 606 | AWH_606  | From whom you usually took the ANC service when you were pregnant?<br><br>(may be multiple answer)    | 1 =Passed doctor<br>2 =Nurses/Midwives/Paramedics<br>3 = FWV<br>4 = Medical assistant/Sub assistant<br>5 = NGO health worker<br>6 = Skilled midwife<br>7 = Trained conventional midwife<br>8 = Conventional midwife<br>77 =Don't know<br>99 = Others (specify bellow)_____                                                                                                                                                                                                                                                                                                                                                |      |                   |
| 607 | AWH_607  | Have you been measured your weight when you were pregnant?                                            | 1=Yes 2=No                                                                                                                                                                                                                                                                                                                                                                                                                                                                                                                                                                                                                |      |                   |
| 608 | AWH_608  | Have you eaten Iron and Folic acid tablet when you were pregnant?                                     | 1=Yes 2=No                                                                                                                                                                                                                                                                                                                                                                                                                                                                                                                                                                                                                |      | If "No" go to 512 |
| 609 | AWH_609  | From where you got Iron and Folic acid tablet when you were pregnant?<br><br>(may be multiple answer) | <b>GOVERNMENT PROVIDERS</b><br>1= Govt. Field worker<br>2= Govt. satellite clinic/ EPI Outreach clinic<br>3= Govt. Community clinic<br>4=Govt. Health & Family Welfare Centre<br>5=Govt. Upazila Health Complex<br>6= Govt. Maternal & Child Welfare Centre Government<br>7=Other government Hospital<br><br><b>NGO PROVIDERS</b><br>8= NGO health clinic and hospital<br>9=NGO Field Worker<br>10= Community Nutrition Promoter (CNP)<br><b>PRIVATE PROVIDERS</b><br>11 = Private doctor/clinic/hospital<br>12 = Pharmacy<br>13 = Traditional healer<br>14 = Homeopath<br>17=Don't know<br>99 = Others<br>(Specify)_____ |      |                   |
| 610 | AWH_610  | How many months did you consume Iron and Folic acid tablet when you were pregnant?                    | _ _ Months                                                                                                                                                                                                                                                                                                                                                                                                                                                                                                                                                                                                                |      |                   |
| 611 | AWH_611  | How many tablet of Iron and Folic acid did you consume in a week when you were pregnant?              | _ _ Tablet                                                                                                                                                                                                                                                                                                                                                                                                                                                                                                                                                                                                                |      |                   |
| 612 | AWH_612  | Did you consume calcium tablet when you were pregnant?                                                | 1=Yes 2=No                                                                                                                                                                                                                                                                                                                                                                                                                                                                                                                                                                                                                |      | If "No" go to 516 |
| 613 | AWH_513  | From where you got Calcium tablet when you were pregnant?<br><br>(may be multiple answer)             | <b>GOVERNMENT PROVIDERS</b><br>1= Govt. Field worker<br>2= Govt. satellite clinic/ EPI Outreach clinic<br>3= Govt. Community clinic<br>4=Govt. Health & Family Welfare Centre<br>5=Govt. Upazila Health Complex<br>6= Govt. Maternal &<br><br><b>NGO PROVIDERS</b><br>8= NGO health clinic and hospital<br>9=NGO Field Worker<br>10= Community Nutrition Promoter (CNP)<br><b>PRIVATE PROVIDERS</b><br>11 = Private doctor/clinic/hospital<br>12 = Pharmacy<br>13 = Traditional healer<br>14 = Homeopath<br>17=Don't know<br>99 = Others                                                                                  |      |                   |



## National Nutrition Surveillance (NNS)

## Section 7: Blood Pressure

Version 1.0/ 31 April 2019



## National Nutrition Surveillance (NNS)

**Referral:**

## Section 8: Anthropometry

Version 1.0/ 31 April 2019



## National Nutrition Surveillance (NNS)

## Module 8: Elderly Men/Women Module

| No  | Variable | Question                                                                                                                                                                                                                                                                      | Response Options                                                                                                                                                                                                                                                                                                                                                                                                                                        | Code | Instructions/Skip |
|-----|----------|-------------------------------------------------------------------------------------------------------------------------------------------------------------------------------------------------------------------------------------------------------------------------------|---------------------------------------------------------------------------------------------------------------------------------------------------------------------------------------------------------------------------------------------------------------------------------------------------------------------------------------------------------------------------------------------------------------------------------------------------------|------|-------------------|
| 101 | EM_101   | Name of the respondent(with nick name)                                                                                                                                                                                                                                        | _____                                                                                                                                                                                                                                                                                                                                                                                                                                                   |      |                   |
| 102 | EM_102   | Date of birth of the respondent                                                                                                                                                                                                                                               | _ _ _ / _ _ _ /20 _ _ _ <br>DD / MM / YYYY                                                                                                                                                                                                                                                                                                                                                                                                              |      |                   |
| 103 | EM_103   | Age in completed years                                                                                                                                                                                                                                                        | _ _ _  Years                                                                                                                                                                                                                                                                                                                                                                                                                                            |      |                   |
| 104 | EM_104   | Sex of respondent                                                                                                                                                                                                                                                             | 1 = Male      2 = Female                                                                                                                                                                                                                                                                                                                                                                                                                                |      |                   |
| 105 | EM_105   | What is your marital status?                                                                                                                                                                                                                                                  | 1 = Never married<br>2 = Currently married<br>3 = Separated;      4 = Divorced<br>5 = Widowed;      88 = Refused                                                                                                                                                                                                                                                                                                                                        |      |                   |
| 106 | EM_106   | Completed years of education the respondent completed<br><b>[Instruction: Write down in total, the years the respondent spent in school for formal education (Is completed years) [Excluding pre-school and informal education). Write down "00" if no formal education.]</b> | _ _ _  Years<br><ul style="list-style-type: none"> <li>• Primary/Ebtedayee=5</li> <li>• Secondary/Dakhil=10</li> <li>• Higher secondary/Diploma/Alim=12</li> <li>• Graduate/Fazil=16</li> <li>• Post graduate/kamil/dawra=18</li> </ul>                                                                                                                                                                                                                 |      |                   |
| 107 | EM_107   | Occupation of the respondent over the past 12 months                                                                                                                                                                                                                          | 1 = Agricultural work(paddy)<br>2 = Agricultural work(without paddy)<br>3 = Agricultural day labor<br>4 = Un skild day labor<br>5 = Skiled day labor<br>6= Driver of Rickshaw/ van/Wheel barrow/Baby taxi/ Boatman<br>7=Fisherman<br>8=Employer<br>9=Profesionals<br>10=Businessman<br>11= Petty businessman<br>12= House maid<br>13=Zoom fermar<br>14= Do not earn<br>15=Poultry/dairy fermar<br>16=Handicrafts<br>17 =Spinach vegetable<br>18=Fisherv |      | JICA Q: C8        |

## Section 2: Dietary diversity

82

|     | Variable      | Question                     |                                                                                                           | Yesterday during the day or night, did your child consume the following food items? (A) | During the last 07 days how many days did your child consume the following food items (B) | During the last 07 dayshow many times did your child consume the following food items (C) |
|-----|---------------|------------------------------|-----------------------------------------------------------------------------------------------------------|-----------------------------------------------------------------------------------------|-------------------------------------------------------------------------------------------|-------------------------------------------------------------------------------------------|
| 204 | EDD_204 A/B/C | Legumes and Nuts             | Peanut, Pistachios, kazu or any kond of peanut, ciya seeds, til, tisi,sunflower seeds,sweet pumpkin seeds | 1 = Yes<br>2 = No                                                                       | _____<br>  days                                                                           | _____<br>  times                                                                          |
| 205 | EDD_205 A/B/C | Dark green leafy vegetables  | All kinds of leafy vegetables (poo,kuchu, kalmi) Brooklyn                                                 | 1 = Yes<br>2 = No                                                                       | _____<br>  days                                                                           | _____<br>  times                                                                          |
| 206 | EDD_206 A/B/C | Red/orange/yellow vegetables | Orange sweet potato,pumpkin, carrot or other yellow or orange vegetable                                   | 1 = Yes<br>2 = No                                                                       | _____<br>  days                                                                           | _____<br>  times                                                                          |
| 207 | EDD_207 A/B/C | Red/orange/yellow fruits     | Ripe mangoes, papaya, jackfruits other red/yellow or orange fruit                                         | 1 = Yes<br>2 = No                                                                       | _____<br>  days                                                                           | _____<br>  times                                                                          |
| 208 | EDD_208 A/B/C | Vitamin C rich fruits        | Guava, Strawberry, Lemon, Orange,grapes, Pineapple,raw mango,amalaki,kueue,tomatos                        | 1 = Yes<br>2 = No                                                                       | _____<br>  days                                                                           | _____<br>  times                                                                          |
| 209 | EDD_209 A/B/C | Vitamin C rich vegetables    | Raw tomato,chilli pepper, brussels sprouts,cauliflower,cabbage                                            | 1 = Yes<br>2 = No                                                                       | _____<br>  days                                                                           | _____<br>  times                                                                          |
| 210 | EDD_210 A/B/C | Other vegetables or fruits   | peas, asparagas, bit,koci bash, cauliflower,selari,shawsha,brinjal,letus, masrum,mula,jukini              | 1 = Yes<br>2 = No                                                                       | _____<br>  days                                                                           | _____<br>  times                                                                          |
| 211 | EDD_211 A/B/C | Other fruits                 | Apple, avakado,bam, cherry,ripe jackfruit                                                                 | 1 = Yes<br>2 = No                                                                       | _____<br>  days                                                                           | _____<br>  times                                                                          |
| 212 | EDD_212 A/B/C | Eggs                         | Hen/duck, other birds,                                                                                    | 1 = Yes<br>2 = No                                                                       | _____<br>  days                                                                           | _____<br>  times                                                                          |
| 213 | EDD_213 A/B/C | Organ meat                   | Cheeks, liver, Stomach, Ridpind, Kidney                                                                   | 1 = Yes<br>2 = No                                                                       | _____<br>  days                                                                           | _____<br>  times                                                                          |
| 214 | EDD_214 A/B/C | Flesh                        | Beef, Pork, Veal, Lamb, Goat, Chicken, Duck or flesh of any other animal                                  | 1 = Yes<br>2 = No                                                                       | _____<br>  days                                                                           | _____<br>  times                                                                          |
| 215 | EDD_215 A/B/C | Small Fish                   | Small Fish Eaten Whole with Bones (i.e.Kachki, mola, dhela, chapila, batashi, small prawn, dried fish)    | 1 = Yes<br>2 = No                                                                       | _____<br>  days                                                                           | _____<br>  times                                                                          |
| 216 | EDD_216 A/B/C | Large fish/sea food          | Large Whole Fish and Shell Fish and dried fish                                                            | 1 = Yes<br>2 = No                                                                       | _____<br>  days                                                                           | _____<br>  times                                                                          |
| 217 | EDD_217 A/B/C | Dairy                        | Milk, cheese, yogurt or other milk products                                                               | 1 = Yes<br>2 = No                                                                       | _____<br>  days                                                                           | _____<br>  times                                                                          |

|                                                                                                                                                                                                                                                                                                                                                           | Variable      | Question                                                                                                                                                                                                                                                                                                                                                                                                                                |                                                                                                                                                                         | Yesterday during the day or night, did your child consume the following food items? (A) | During the last 07 days how many days did your child consume the following food items (B) | During the last 07 dayshow many times did your child consume the following food items (C) |
|-----------------------------------------------------------------------------------------------------------------------------------------------------------------------------------------------------------------------------------------------------------------------------------------------------------------------------------------------------------|---------------|-----------------------------------------------------------------------------------------------------------------------------------------------------------------------------------------------------------------------------------------------------------------------------------------------------------------------------------------------------------------------------------------------------------------------------------------|-------------------------------------------------------------------------------------------------------------------------------------------------------------------------|-----------------------------------------------------------------------------------------|-------------------------------------------------------------------------------------------|-------------------------------------------------------------------------------------------|
| 218                                                                                                                                                                                                                                                                                                                                                       | EDD_218       | Insects and other protein foods                                                                                                                                                                                                                                                                                                                                                                                                         | Fish egg, insect, snail                                                                                                                                                 | 1 = Yes<br>2 = No                                                                       | _____<br>  days                                                                           | _____<br>  times                                                                          |
| 219                                                                                                                                                                                                                                                                                                                                                       | EDD_219 A/B/C | Edible Oil                                                                                                                                                                                                                                                                                                                                                                                                                              | Ghee, butter,cream, sour, fat, margarine, mayonnaise, palm oil, vegetable oil,                                                                                          | 1 = Yes<br>2 = No                                                                       | _____<br>  days                                                                           | _____<br>  times                                                                          |
| 220                                                                                                                                                                                                                                                                                                                                                       | EDD_220 A/B/C | Savory and fried snacks                                                                                                                                                                                                                                                                                                                                                                                                                 | Crisps and chips, fried dough or other fried snacks singaru, samarcha                                                                                                   | 1 = Yes<br>2 = No                                                                       | _____<br>  days                                                                           | _____<br>  times                                                                          |
| 221                                                                                                                                                                                                                                                                                                                                                       | EDD_221 A/B/C | Sweets                                                                                                                                                                                                                                                                                                                                                                                                                                  | Sugary foods, such as chocolates, candies, cookies/sweet biscuits and cakes, sweet pastries or ice cream, any kind of sweets ,honey ,halua , condensed milk,tiler khaza | 1 = Yes<br>2 = No                                                                       | _____<br>  days                                                                           | _____<br>  times                                                                          |
| 222                                                                                                                                                                                                                                                                                                                                                       | EDD_222 A/B/C | Miscellaneous (Sweet drinks)                                                                                                                                                                                                                                                                                                                                                                                                            | Tea with suger, soft drinks, juice, energy drinks,yogurt drinks,chocolate drinks, horlicks,moltova                                                                      | 1 = Yes<br>2 = No                                                                       | _____<br>  days                                                                           | _____<br>  times                                                                          |
| 223                                                                                                                                                                                                                                                                                                                                                       | EDD_223 A/B/C | Other beverages and foods                                                                                                                                                                                                                                                                                                                                                                                                               | Tea or coffee if not sweetened, clear broth, alcohol, Pickles, olives and similar                                                                                       | 1 = Yes<br>2 = No                                                                       | _____<br>  days                                                                           | _____<br>  times                                                                          |
| 224                                                                                                                                                                                                                                                                                                                                                       | EDD_224 A/B/C | Condiments/spices                                                                                                                                                                                                                                                                                                                                                                                                                       | Spices, coriander leaves, sausage, garlic, ketchup, lemon juice, mint leaves, drinks, betel leaves, tobacco leaves, jars                                                | 1 = Yes<br>2 = No                                                                       | _____<br>  days                                                                           | _____<br>  times                                                                          |
| No                                                                                                                                                                                                                                                                                                                                                        | Variable      | Question                                                                                                                                                                                                                                                                                                                                                                                                                                |                                                                                                                                                                         | Response Options                                                                        | Code                                                                                      | Instructions/ Skip                                                                        |
| <p>The next questions I will ask about the <b>fruits and vegetables</b> that you usually eat; I have a nutrition card/picture here that shows you some examples of local fruits and vegetables; Each picture represents the size of a serving; To answer these questions, please think of a typical week.(If 1-2 times/month then record it as "00.")</p> |               |                                                                                                                                                                                                                                                                                                                                                                                                                                         |                                                                                                                                                                         |                                                                                         |                                                                                           |                                                                                           |
| 225                                                                                                                                                                                                                                                                                                                                                       | EDD_225       | <p>In a <u>typical week</u>, on how many <u>days</u> do you <u>eat fruit</u>?</p> <p><b>Instruction:</b> Demonstrate fruit's show card and ask the participant to think about it. Do not consider packaged fruit juice but consider fruit juice prepared at home using fresh fruits. A typical week refers to "A usual week except religious event or any other festival. If 1-2 times/month then record it as "00." [USE SHOWCARD]</p> |                                                                                                                                                                         | <p>Number of days<br/>_____<br/>77 = Don't Know<br/>[If '00' days, go to ABD_227]</p>   |                                                                                           |                                                                                           |

Section 3: Behavioral risk factor (Smoking/smokeless tobacco physical activity)Tobacco Use

Now I am going to ask you some questions about tobacco (Smoke tobacco and smokeless tobacco) use.



## National Nutrition Surveillance (NNS)

| No  | Variable | Question                                                                                                                                                                                                                                                                                                                                                                                                                                                                                                                                                                                                                                                                                                                                                                                             | Response Options                         | Code | Instructions/ Skip |
|-----|----------|------------------------------------------------------------------------------------------------------------------------------------------------------------------------------------------------------------------------------------------------------------------------------------------------------------------------------------------------------------------------------------------------------------------------------------------------------------------------------------------------------------------------------------------------------------------------------------------------------------------------------------------------------------------------------------------------------------------------------------------------------------------------------------------------------|------------------------------------------|------|--------------------|
| 301 | ER_301   | Do you <u>currently</u> smoke any tobacco products, such as cigarettes, <i>bidis</i> , <i>hookah</i> , cigars or pipes?<br><br><i>Instruction: Demonstrate show card to the participant and ask which smoke tobacco products/he use. [USE SHOWCARD]</i>                                                                                                                                                                                                                                                                                                                                                                                                                                                                                                                                              | 1 = Yes; 2= No<br>If No, go to ABR_304   |      |                    |
| 302 | ER_302   | Do you <u>currently</u> smoke tobacco products <u>daily</u> ?<br><br><i>Instruction: This question is applicable for those respondents who smoke tobacco product daily. Daily means" tobacco smoking is at least one time/day for almost one month or more than that</i><br><i>If that is the case respondent started somoking from 25 days and still running, that is regarded as everyday.</i>                                                                                                                                                                                                                                                                                                                                                                                                     | 1 = Yes; 2= No                           |      |                    |
| 303 | ER_303   | How old were you when you <b>first started</b> smoking?                                                                                                                                                                                                                                                                                                                                                                                                                                                                                                                                                                                                                                                                                                                                              | Age <u>    </u> years<br>77 = Don't know |      |                    |
| 304 | ER_304   | Do you currently use any smokeless tobacco products such as Betel quid with zarda, zarda only or zarda with supari, Betel quid with sadapata, pan masala with tobacco, sadapata chewing, gul, Khoinee, Nossi, gutka?<br><b>Instruction:</b> Ask respondent to think and answer whether h/she use any smokeless tobacco products such as Betel quid with zarda, zarda only or zarda with supari, Betel quid with sadapata, pan masala with tobacco, sadapata chewing, gul, Khoinee, Nossi, gutka. Here, only betel quid, supari and lime will not be considered. It will be considered as smokeless tobacco if respondent use Betel quid with zarda, zarda only or zarda with supari, Betel quid with sadapata, pan masala with tobacco, sadapata chewing, gul, Khoinee, Nossi, gutka. [USE SHOWCARD] | 1 = Yes; 2= No<br>If No, go to ABR_307   |      |                    |
| 305 | ER_305   | Do you <u>currently</u> use <u>smokeless tobacco</u> <u>daily</u> ?<br><b>Instruction:</b> Daily means "using smokeless tobacco is at least one time/day for almost one month or more than that.<br><i>If that is the case respondent started somoking from 25 days and still running, that is regarded as everyday.</i>                                                                                                                                                                                                                                                                                                                                                                                                                                                                             | 1 = Yes; 2= No                           |      |                    |
| 306 | ER_306   | How old were you when you started smokeless tobacco?                                                                                                                                                                                                                                                                                                                                                                                                                                                                                                                                                                                                                                                                                                                                                 | Age <u>    </u> years<br>77 = Don't know |      |                    |

82



| Now I would like to know about the 'Moderate-intensity activity' you perform                                                                                                                                                                                                                                                    |        |                                                                                                                                                                                                                                                                                                                                                                                                                                                                                                                                                                                                                           |                                                                               |  |  |
|---------------------------------------------------------------------------------------------------------------------------------------------------------------------------------------------------------------------------------------------------------------------------------------------------------------------------------|--------|---------------------------------------------------------------------------------------------------------------------------------------------------------------------------------------------------------------------------------------------------------------------------------------------------------------------------------------------------------------------------------------------------------------------------------------------------------------------------------------------------------------------------------------------------------------------------------------------------------------------------|-------------------------------------------------------------------------------|--|--|
| 'Moderate-intensity activity' performed as a part of daily work / professional work                                                                                                                                                                                                                                             |        |                                                                                                                                                                                                                                                                                                                                                                                                                                                                                                                                                                                                                           |                                                                               |  |  |
| 311                                                                                                                                                                                                                                                                                                                             | ER_311 | Does your <u>daily work / professional work/ spots/fitness/ recreational (leisure) work</u> involve <u>moderate-intensity activity</u> that causes small increases in breathing or heart rate such as brisk walking [or carrying light loads, cycling, swimming, volleyball] for at least 10 minutes continuously?<br><b>Instruction:</b> Ask participant to think about those moderate-intensity activities performed as a part of professional work/ recreational activities. Those activities will be considered as moderate-intensity activities that causes small increase in breathing or heart rate. [USESHOWCARD] | 1 = Yes    2 = No<br>[If 'No', please go to ABR_314]                          |  |  |
| 312                                                                                                                                                                                                                                                                                                                             | ER_312 | In a typical week, on how many days do you do <u>moderate- intensity activities</u> as part of your <u>daily work / professional work/sports/fitness or recreational work</u> ?<br><b>Instruction:</b> In a typical week refers to "activities done by respondent in a typical week". Valid response range is 1-7 days.                                                                                                                                                                                                                                                                                                   | <u>    </u> Day<br>77 = Don't know<br>[If 'Don't know', please go to ABR_314] |  |  |
| 313                                                                                                                                                                                                                                                                                                                             | ER_313 | How much time do you spend doing <u>moderate-intensity activities</u> at <u>daily work / professional work/ sports/fitness or recreational work</u> on a typical day?<br><b>Instruction:</b> Ask respondent to think about a single day (which can be remembered easily) s/he performed moderate-intensity activities as part of professional work/recreational activities. Respondent will consider only those activities that are performed for at least 10 minutes or more continuously. Check unusual (more than 04 hours) values.                                                                                    | <u>                    </u><br>Minutes                                        |  |  |
| <b>Sedentary behavior</b> The following question is about sitting or reclining at work, at home, getting to and from places, or with friends including time spent sitting at a desk, sitting with friends, traveling in car, bus, train, reading, playing cards or watching television, but do not include time spent sleeping. |        |                                                                                                                                                                                                                                                                                                                                                                                                                                                                                                                                                                                                                           |                                                                               |  |  |
| 314                                                                                                                                                                                                                                                                                                                             | ER_314 | How much time do you usually spend sitting or reclining on a typical day?<br><b>Instruction:</b> Ask respondent to think about time spent on sitting or reclining at work, office, study, watching television, computer use, at kitchen, during rest. Do not include time spent during sleeping.                                                                                                                                                                                                                                                                                                                          | <u>                    </u><br>Minutes                                        |  |  |
| 315                                                                                                                                                                                                                                                                                                                             | ER_315 | How much time do you watch television daily?                                                                                                                                                                                                                                                                                                                                                                                                                                                                                                                                                                              | <u>                    </u><br>Minutes                                        |  |  |

#### Section 4: Chronic Disease

| No  | Variable | Question                                                                                                                           | Response Options | Code | Instructions/ Skip |
|-----|----------|------------------------------------------------------------------------------------------------------------------------------------|------------------|------|--------------------|
| 401 | ECD_401  | Has a health care provider ever told you that you have high blood pressure also called hypertension (other than during pregnancy)? | 1 = Yes 2 = No   |      |                    |
| 402 | ECD_402  | Has a health care provider ever told you that you have heart disease?                                                              | 1 = Yes 2 = No   |      |                    |
| 403 | ECD_403  | Has a health care provider ever told you that you have asthma/bronchitis?                                                          | 1 = Yes 2 = No   |      |                    |



## National Nutrition Surveillance (NNS)

### Section 5: Nutritional Assessment Screening question

Section 6: Quality of Life (QoL)82



## Section 7: Blood Pressure(BP)

Referral:

| No. | Variable | Question         | Responses and code categories | Code | Instructions/Skip     |
|-----|----------|------------------|-------------------------------|------|-----------------------|
| 708 | EBP 708  | Referral needed? | 1 = Yes    2 = No             |      | If 2, go to section 8 |



National Nutrition Surveillance (NNS)

## Section 8: Anthropometry

## Module 9: Planned Modules

| No. | Variable | Question                     | Responses and code categories              |                 | Code | Instructions/Skip |
|-----|----------|------------------------------|--------------------------------------------|-----------------|------|-------------------|
| 101 | PM_101   | Modules to be completed      | A= Module 2 : Household module             | 1= Yes<br>2= No |      |                   |
|     |          |                              | B= Module 3 : Child module                 | 1= Yes<br>2= No |      |                   |
|     |          |                              | C= Module 4 : Adolescent boys module       | 1= Yes<br>2= No |      |                   |
|     |          |                              | D= Module 5 : Adolescents girls module     | 1= Yes<br>2= No |      |                   |
|     |          |                              | E= Module 6 : Adult men module             | 1= Yes<br>2= No |      |                   |
|     |          |                              | F= Module 7 : Adule women module           | 1= Yes<br>2= No |      |                   |
|     |          |                              | G= Module 8 : Elderly person module        | 1= Yes<br>2= No |      |                   |
| 102 | PM_102   | Completed modules            | A= Module 2 : Household module             | 1= Yes<br>2= No |      |                   |
|     |          |                              | B= Module 3 : Child module                 | 1= Yes<br>2= No |      |                   |
|     |          |                              | C= Module 4 : Adolescent boys module       | 1= Yes<br>2= No |      |                   |
|     |          |                              | D= Module 5 : Adolescents girls module     | 1= Yes<br>2= No |      |                   |
|     |          |                              | E= Module 6 : Adult men module             | 1= Yes<br>2= No |      |                   |
|     |          |                              | F= Module 7 : Adule women module           | 1= Yes<br>2= No |      |                   |
|     |          |                              | G= Module 8 : Elderly person module        | 1= Yes<br>2= No |      |                   |
| 103 | PM_103   | Revisit needed               | 1= Yes ;                  2= No            |                 |      |                   |
| 104 | PM_104   | Date of revisit              | _ _ _ / _ _ _ /20 _ _ _ <br>DD / MM / YYYY |                 |      |                   |
| 105 | PM_105   | Date of interview completion | _ _ _ / _ _ _ /20 _ _ _ <br>DD / MM / YYYY |                 |      |                   |
| 106 | PM_106   | Time of interview completion | _ _ _ : _ _ _ <br>HH : MM                  |                 |      | Use 24H format    |
| 107 | PM_107   | Comment of interviewer       |                                            |                 |      |                   |

**Thank you for your participation and cooperation**
